# Supplementary material for: Tracking Se Assimilation and Speciation through the Rice Plant – Nutrient Competition, Toxicity and Distribution
Source: PLOS journal article supplement (doi:10.1371/journal.pone.0152081), 2016-04-26
Supplement: S1 (10.1371/journal.pone.0152081.s001) [file journal.pone.0152081.s001]

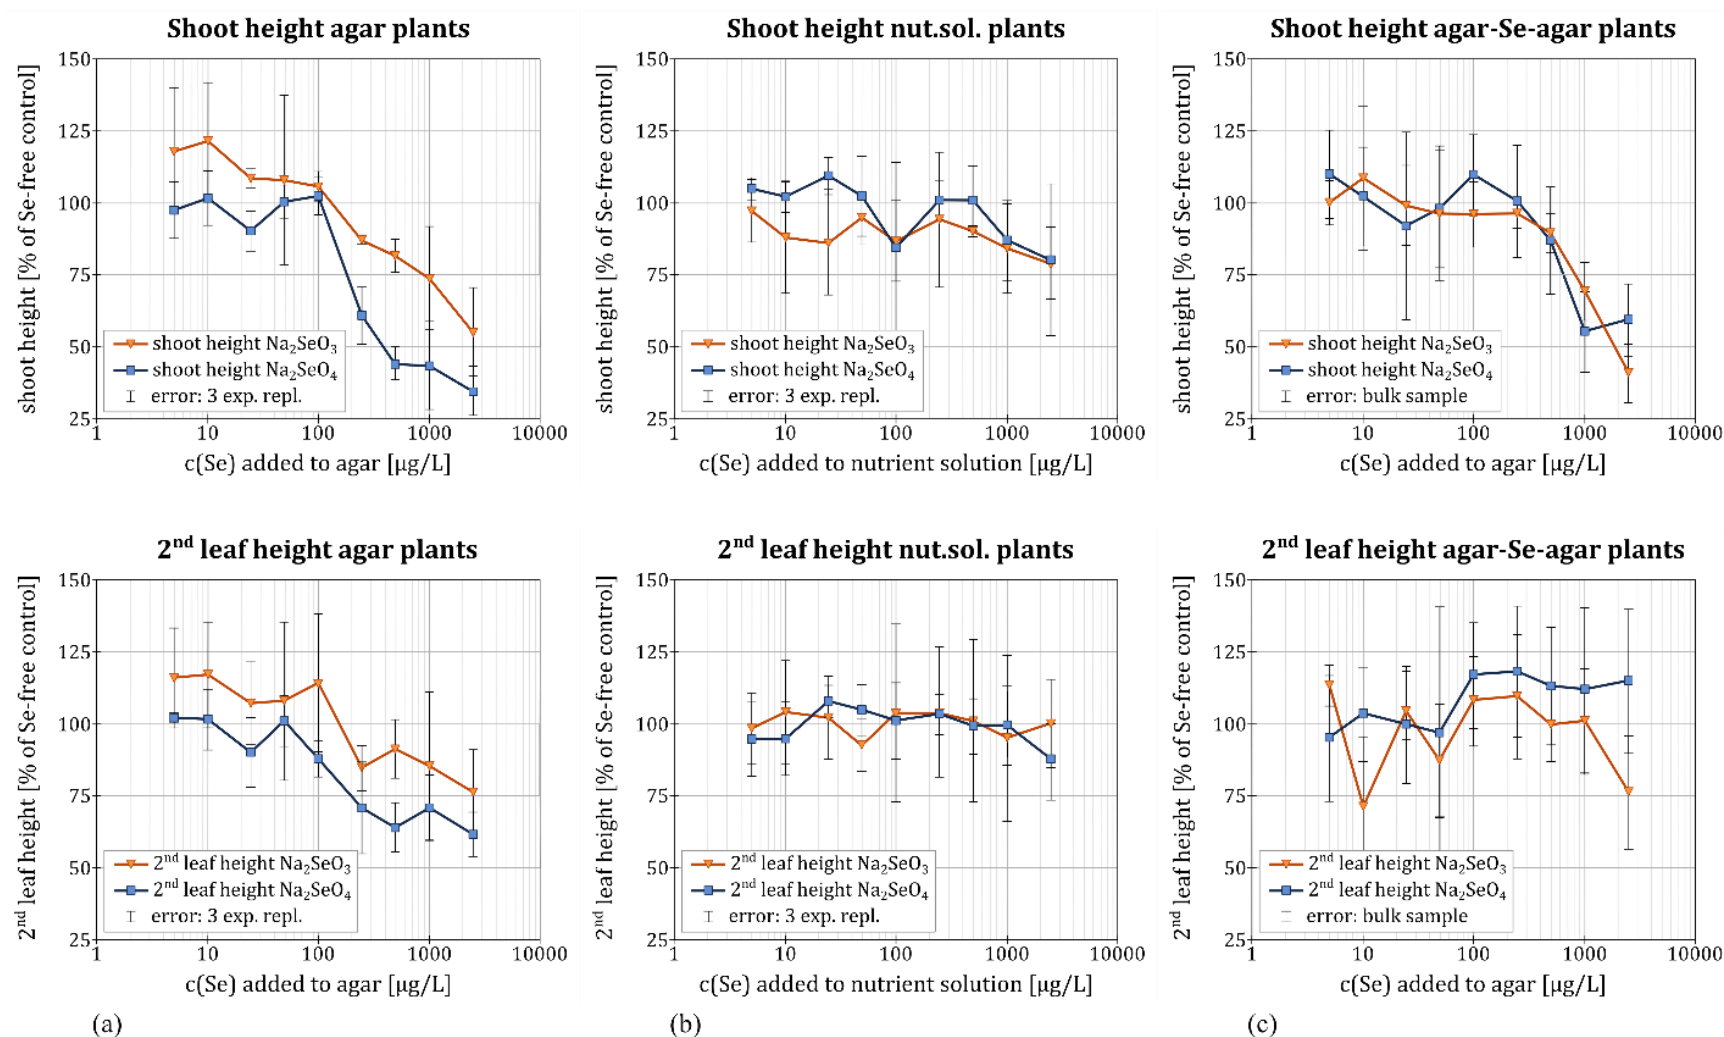

**S1 Fig: Plant growth expressed as percentage of Se-free blank plants, for shoot height and height of the 2<sup>nd</sup> leaf for all three experimental set-ups: nutrient-free, direct Se exposure (a), Se-nutrient solution, delayed Se exposure (b) and nutrient-free, delayed Se exposure experiments (c).**
