# Supplementary material for: Tracking Se Assimilation and Speciation through the Rice Plant – Nutrient Competition, Toxicity and Distribution
Source: PLOS journal article supplement (doi:10.1371/journal.pone.0152081), 2016-04-26
Supplement: S2 (10.1371/journal.pone.0152081.s002) [file journal.pone.0152081.s002]

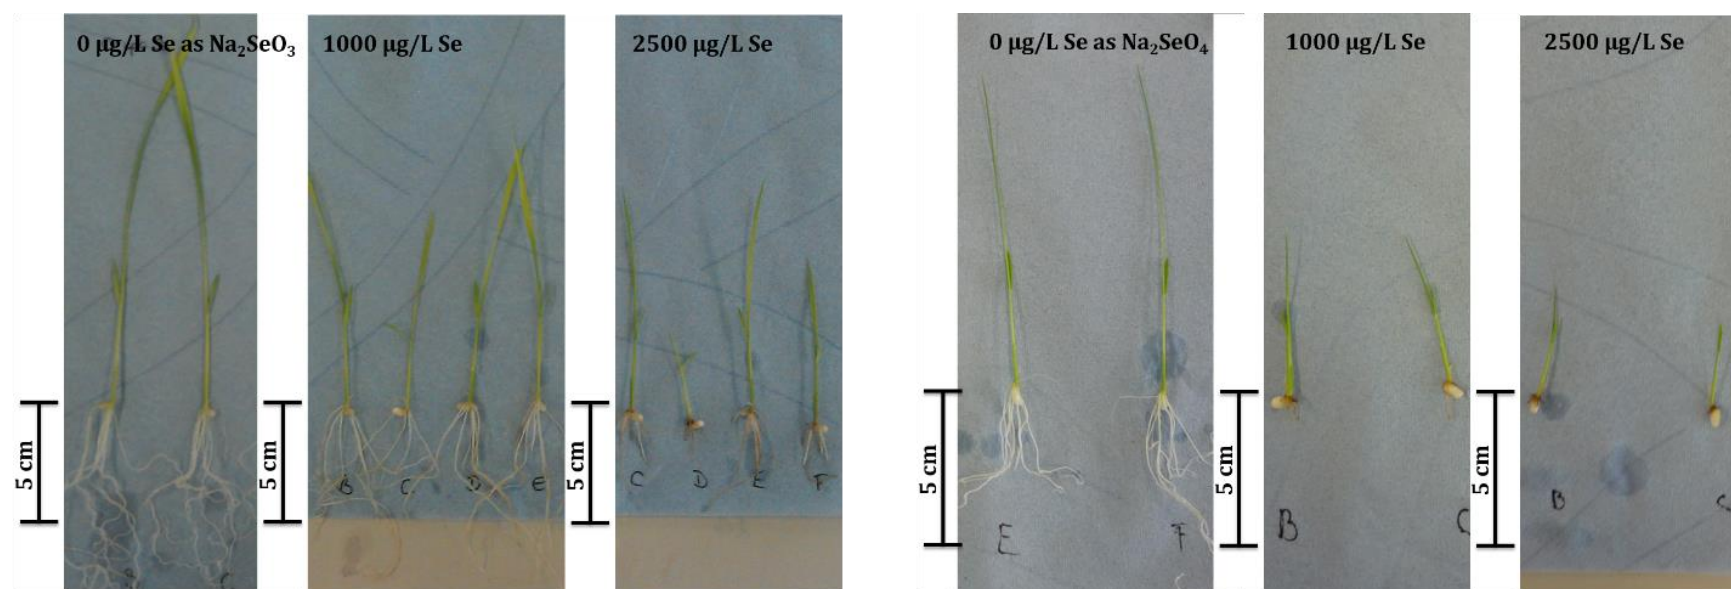

**S1 Fig: comparison of rice root growth for the additions of 0, 1000 and 2500 µg/L Se as Na<sub>2</sub>SeO<sub>3</sub> or Na<sub>2</sub>SeO<sub>4</sub> to agar of the nutrient-free, direct Se exposure experiment**
