# Supplementary material for: Tracking Se Assimilation and Speciation through the Rice Plant – Nutrient Competition, Toxicity and Distribution
Source: PLOS journal article supplement (doi:10.1371/journal.pone.0152081), 2016-04-26
Supplement: S3 (10.1371/journal.pone.0152081.s003) [file journal.pone.0152081.s003]

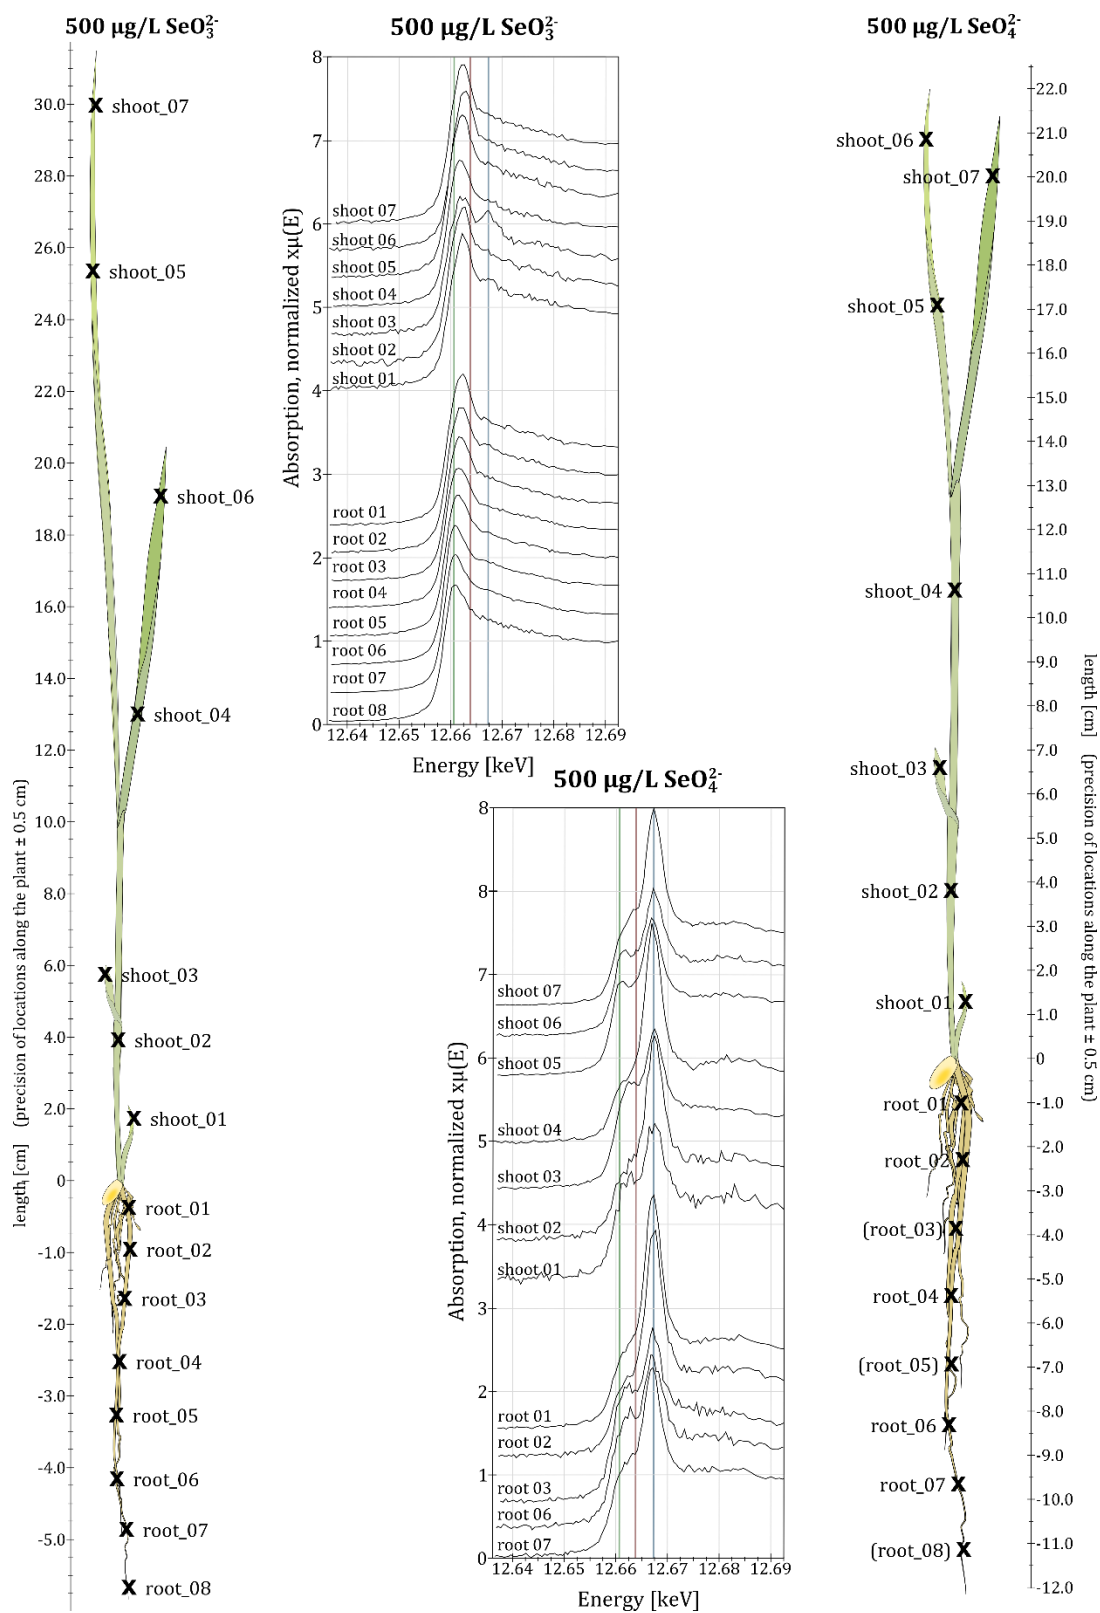

**S1 Fig: XANES of the shoot and root of a dried rice plant treated with 500 µg/L Se as  $\text{Na}_2\text{SeO}_3$  (left) or  $\text{Na}_2\text{SeO}_4$  (right); green, red & blue indicating peak lines for selenomethionine (12.661 keV), selenite (12.664 keV) and selenate (12.667 keV), respectively**
