# Supplementary material for: Tracking Se Assimilation and Speciation through the Rice Plant – Nutrient Competition, Toxicity and Distribution
Source: PLOS journal article supplement (doi:10.1371/journal.pone.0152081), 2016-04-26
Supplement: S4 (10.1371/journal.pone.0152081.s004) [file journal.pone.0152081.s004]

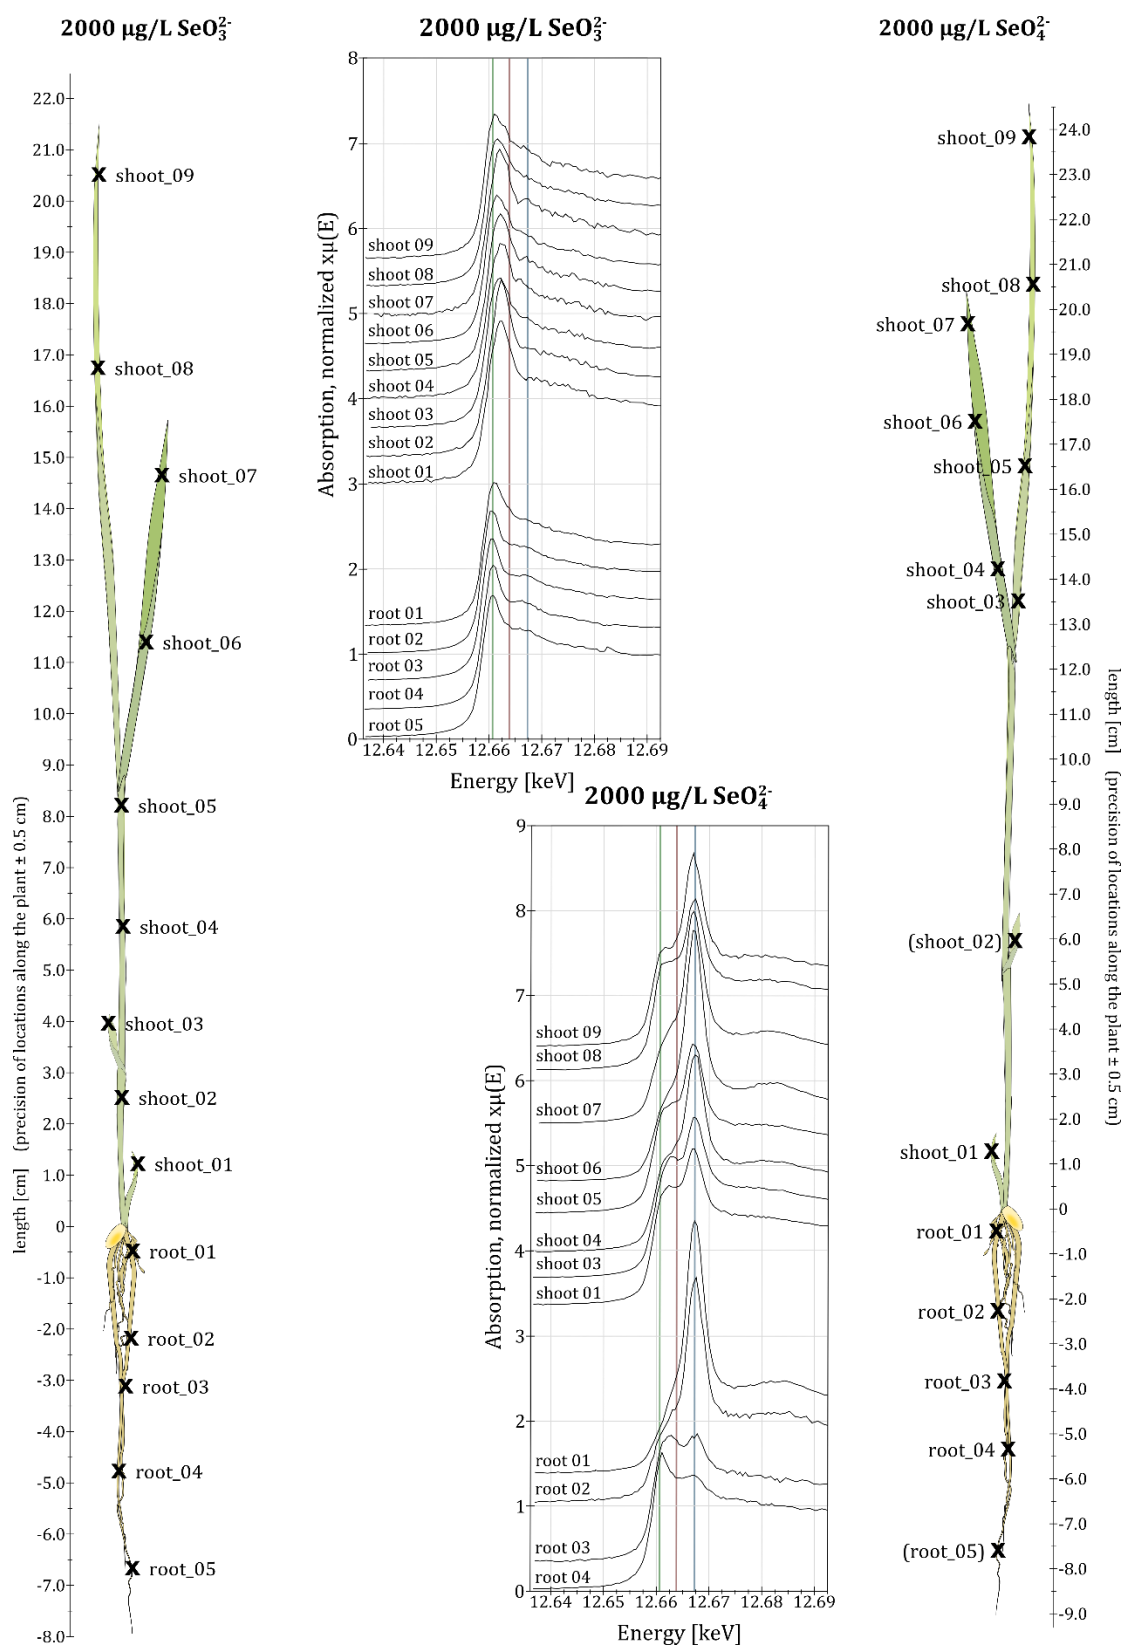

**S1 Fig: XANES of the shoot and root of a dried rice plant treated with 2000 µg/L Se as Na<sub>2</sub>SeO<sub>3</sub> (left) or Na<sub>2</sub>SeO<sub>4</sub> (right); green, red & blue indicating peak lines for selenomethionine (12.661 keV), selenite (12.664 keV) and selenate (12.667 keV), respectively**
