# Supplementary material for: Tracking Se Assimilation and Speciation through the Rice Plant – Nutrient Competition, Toxicity and Distribution
Source: PLOS journal article supplement (doi:10.1371/journal.pone.0152081), 2016-04-26
Supplement: S6 (10.1371/journal.pone.0152081.s006) [file journal.pone.0152081.s006]

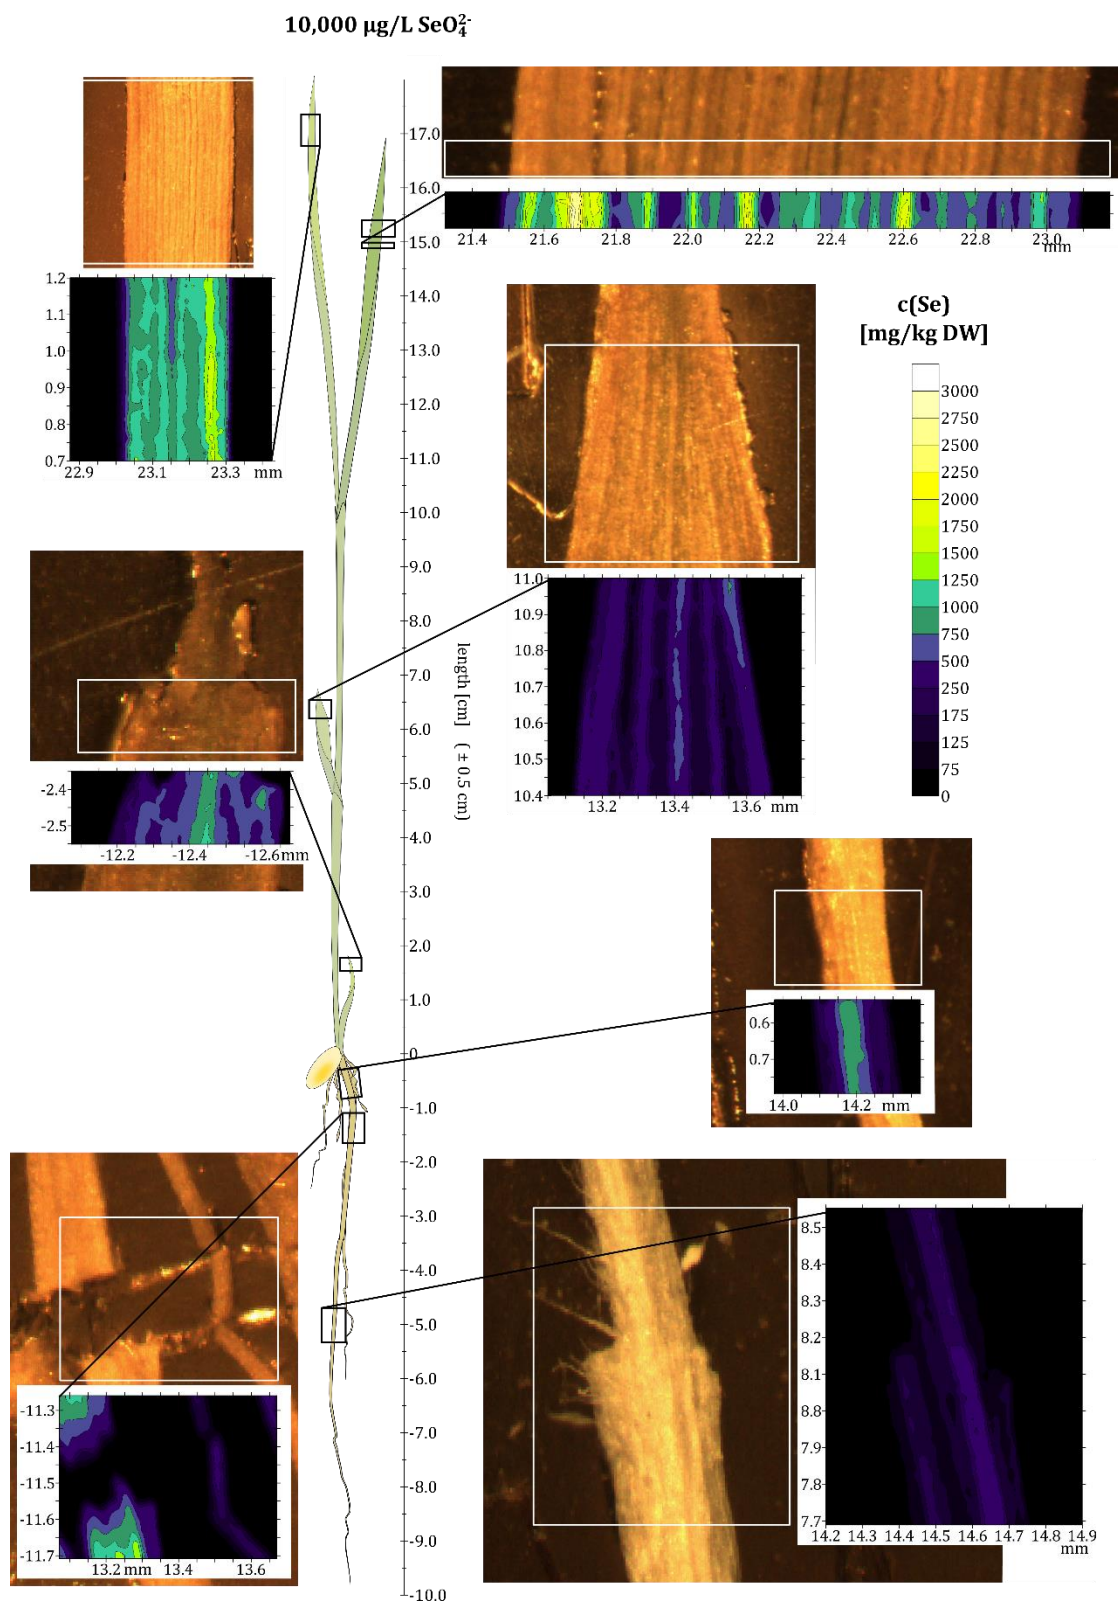

**S1 Fig: Selenium fluorescence mappings of shoot and root tissue of a dried rice plant treated with 10,000  $\mu\text{g/L Se}$  as  $\text{Na}_2\text{Se}_4$ ; photos taken with a binocular**
