# Supplementary material for: Tracking Se Assimilation and Speciation through the Rice Plant – Nutrient Competition, Toxicity and Distribution
Source: PLOS journal article supplement (doi:10.1371/journal.pone.0152081), 2016-04-26
Supplement: S8 (10.1371/journal.pone.0152081.s008) [file journal.pone.0152081.s008]

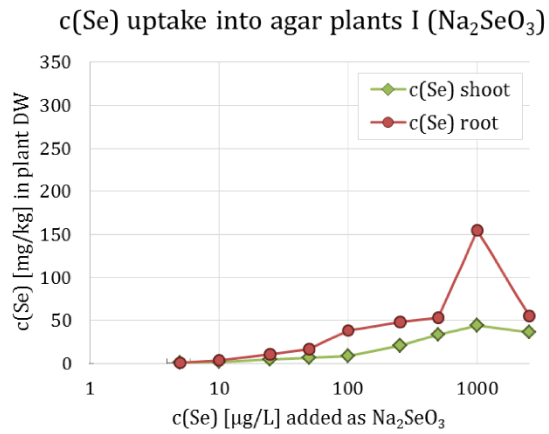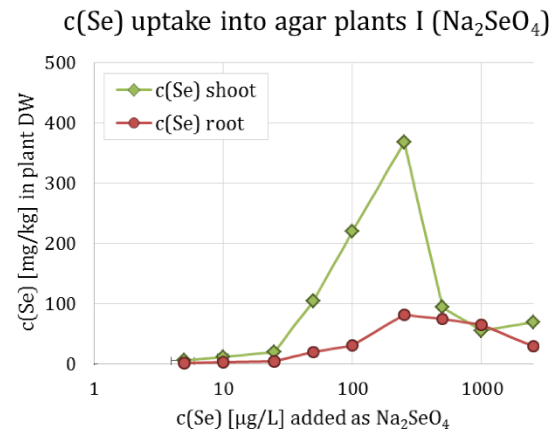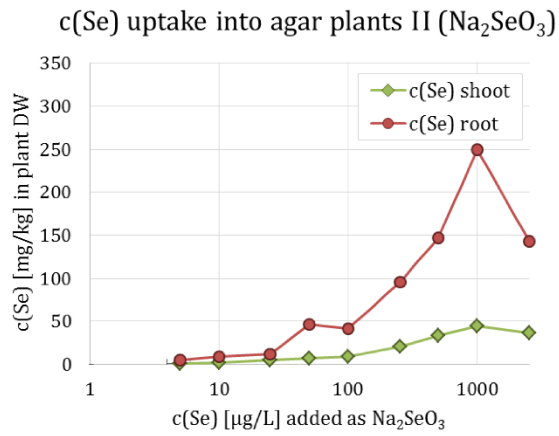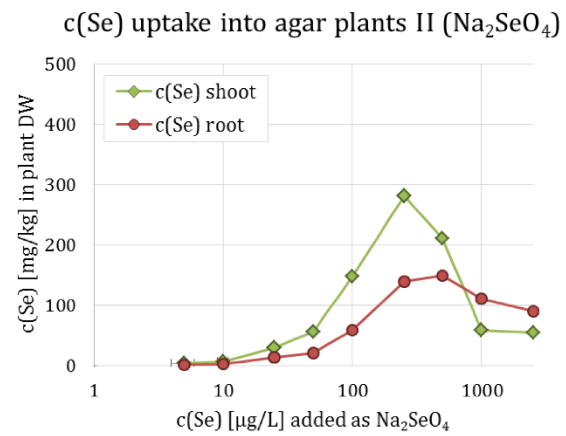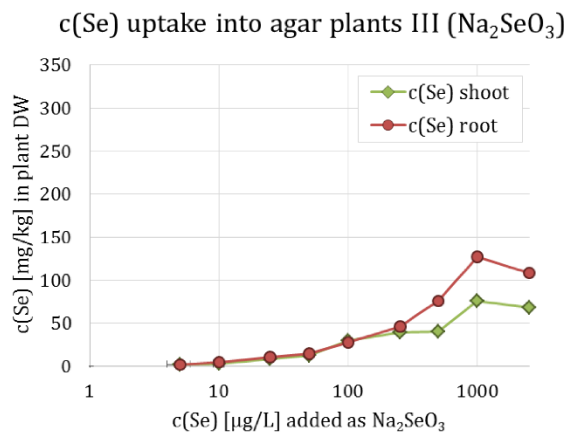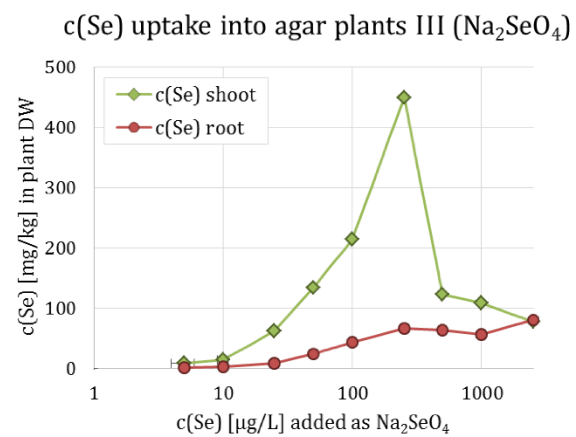

**S1 Fig: Results for plant Se content for each of the three experimental runs of agar experiments**
