# Supplementary material for: Tracking Se Assimilation and Speciation through the Rice Plant – Nutrient Competition, Toxicity and Distribution
Source: PLOS journal article supplement (doi:10.1371/journal.pone.0152081), 2016-04-26
Supplement: S10 (10.1371/journal.pone.0152081.s010) [file journal.pone.0152081.s010]

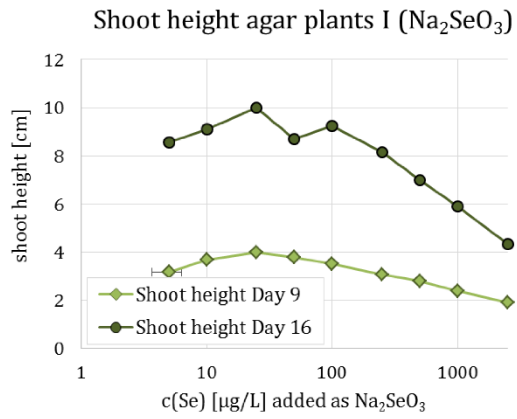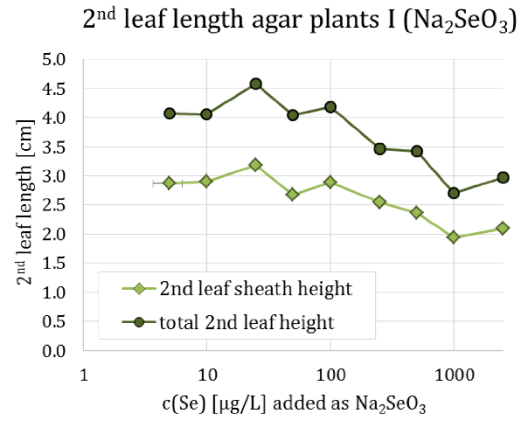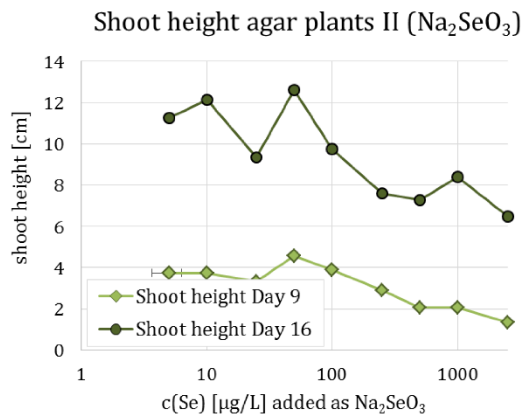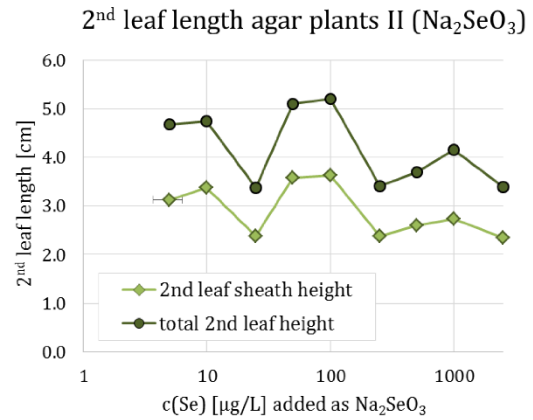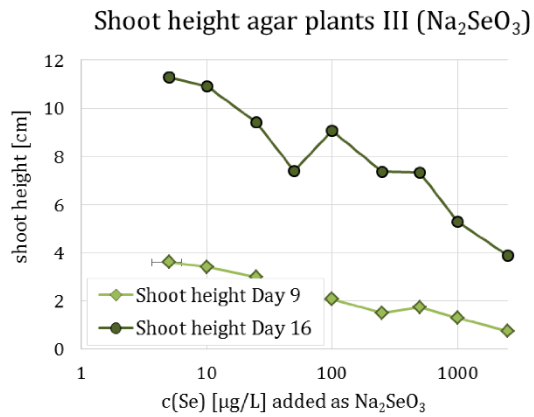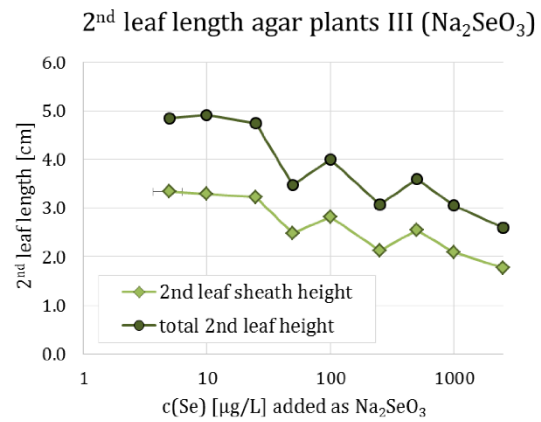

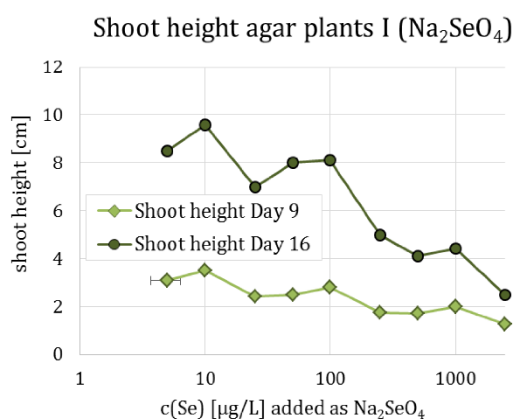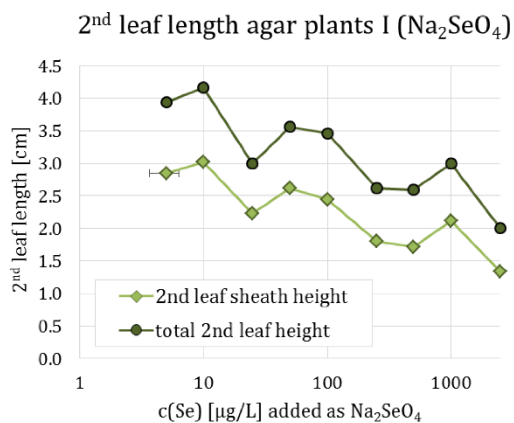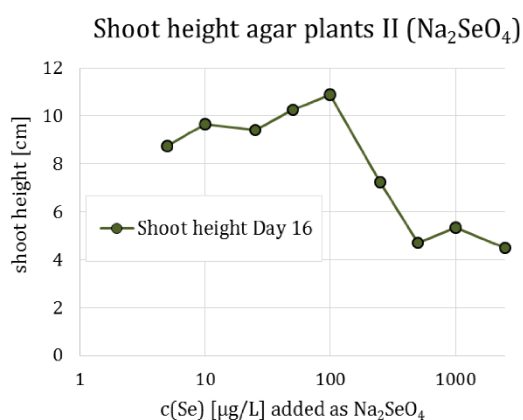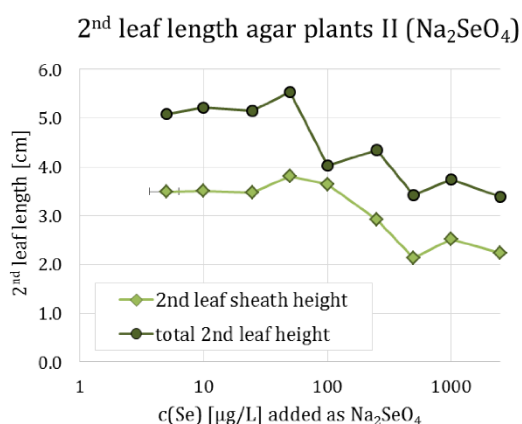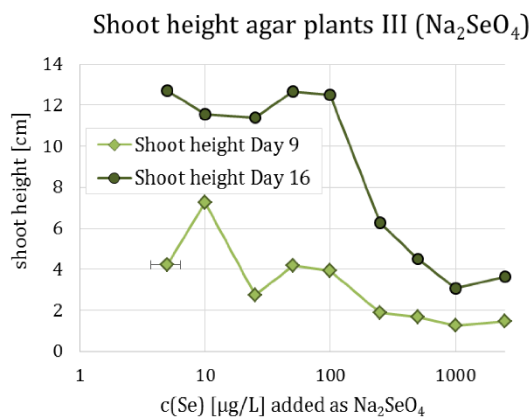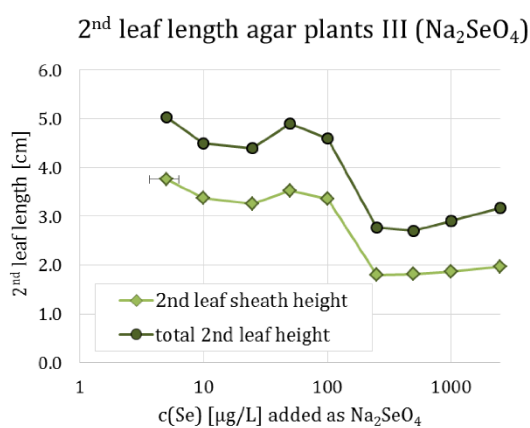

S10 Fig: Results for shoot height and length of the 2nd leaf for plants from the agar experiments
