# Supplementary material for: Tracking Se Assimilation and Speciation through the Rice Plant – Nutrient Competition, Toxicity and Distribution
Source: PLOS journal article supplement (doi:10.1371/journal.pone.0152081), 2016-04-26
Supplement: S11 (10.1371/journal.pone.0152081.s011) [file journal.pone.0152081.s011]

Shoot height nut.sol. plants I ( $\text{Na}_2\text{SeO}_3$ )

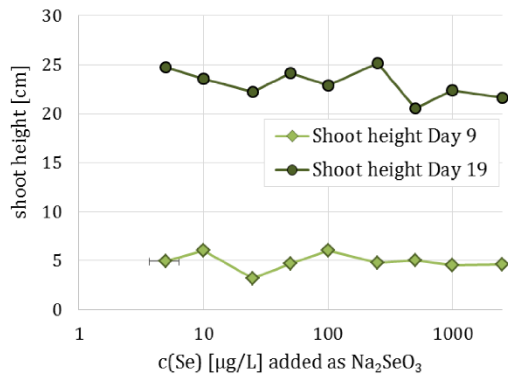

2<sup>nd</sup> leaf nut.sol. plants I ( $\text{Na}_2\text{SeO}_3$ )

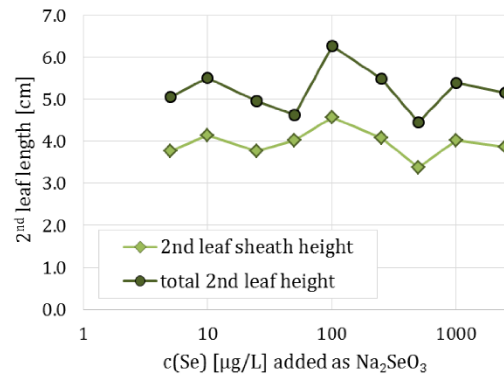

Shoot height nut.sol. plants II ( $\text{Na}_2\text{SeO}_3$ )

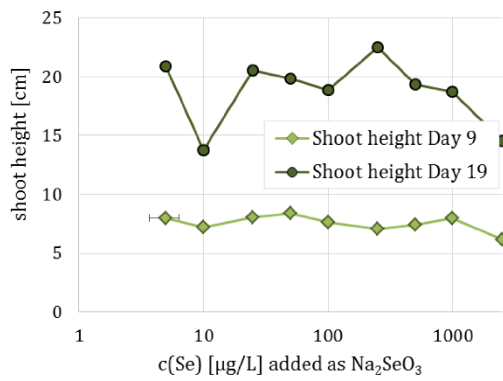

2<sup>nd</sup> leaf nut.sol. plants II ( $\text{Na}_2\text{SeO}_3$ )

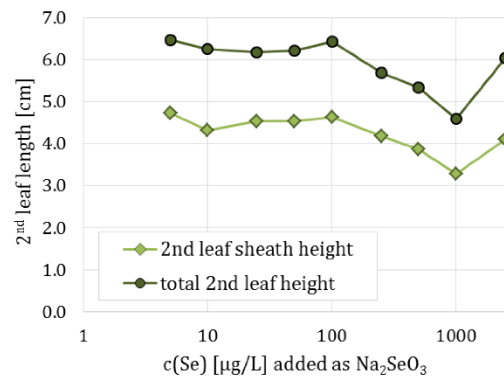

Shoot height nut.sol. plants III ( $\text{Na}_2\text{SeO}_3$ )

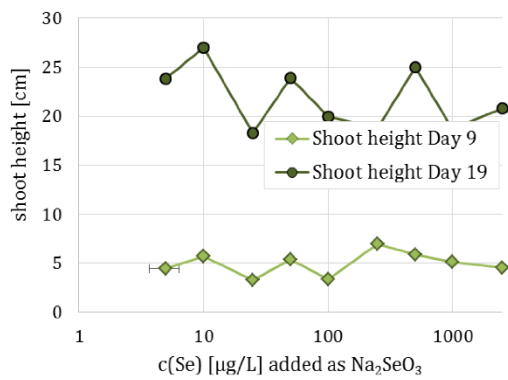

2<sup>nd</sup> leaf nut.sol. plants III ( $\text{Na}_2\text{SeO}_3$ )

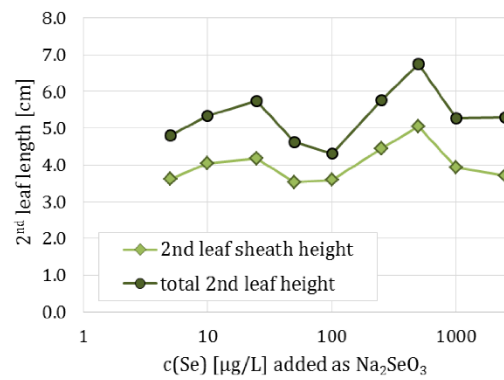

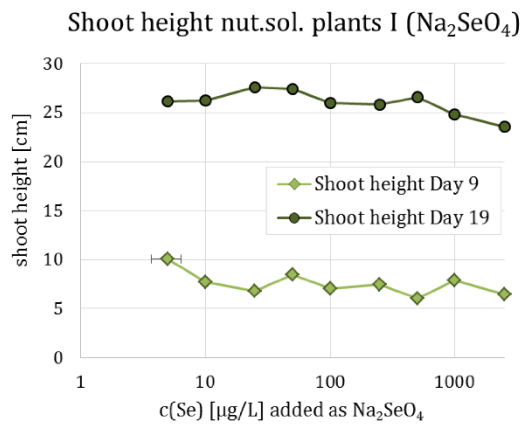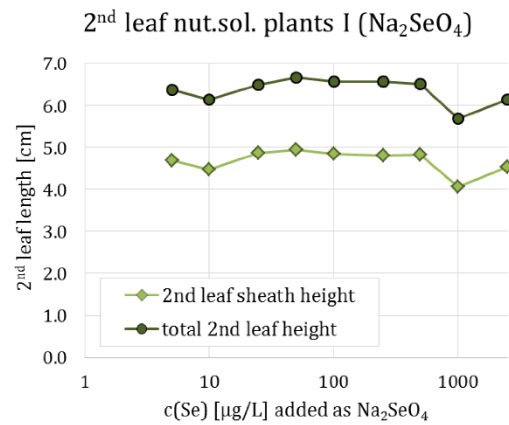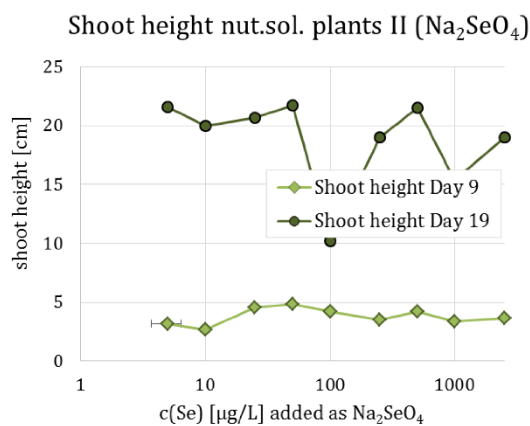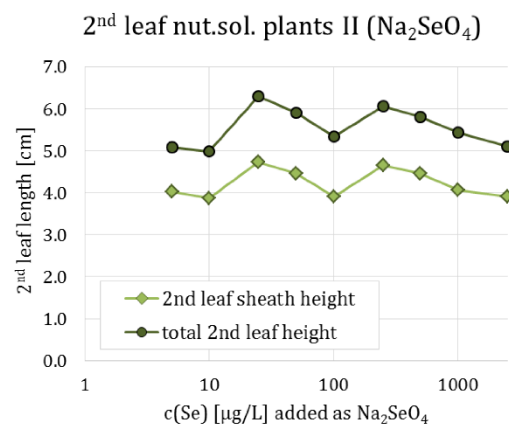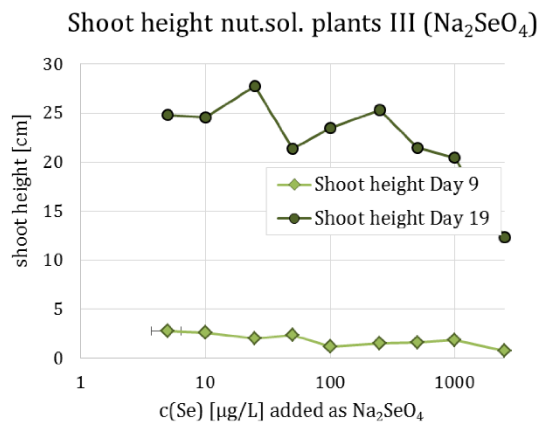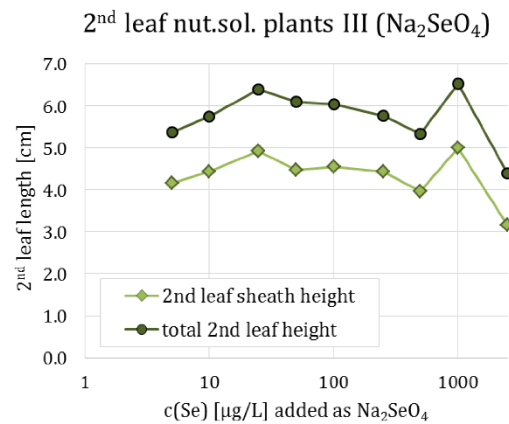

**S11 Fig: Results for shoot height and length of the 2nd leaf for plants from the nutrient solution experiments**
