# Supplementary material for: Tracking Se Assimilation and Speciation through the Rice Plant – Nutrient Competition, Toxicity and Distribution
Source: PLOS journal article supplement (doi:10.1371/journal.pone.0152081), 2016-04-26
Supplement: S12 (10.1371/journal.pone.0152081.s012) [file journal.pone.0152081.s012]

### N & P uptake into plants

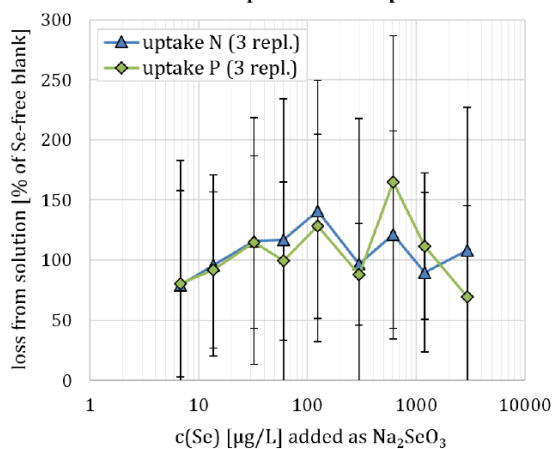

### K & S uptake into plants

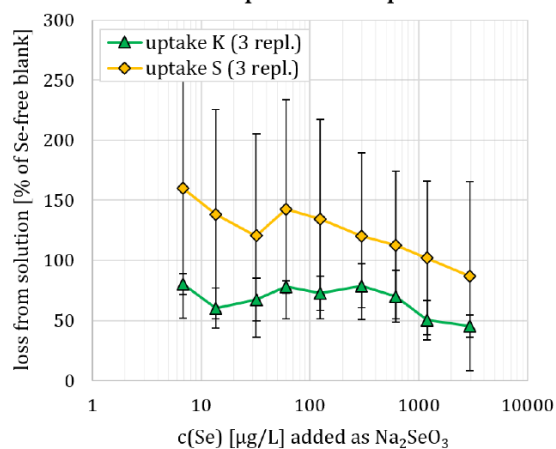

### Ca & Mg uptake into plants

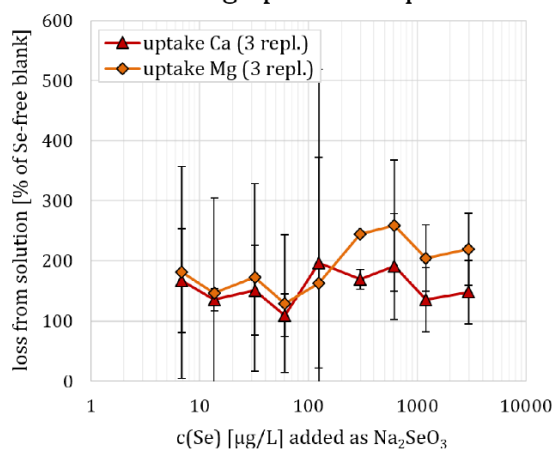

### Mn & Zn uptake into plants

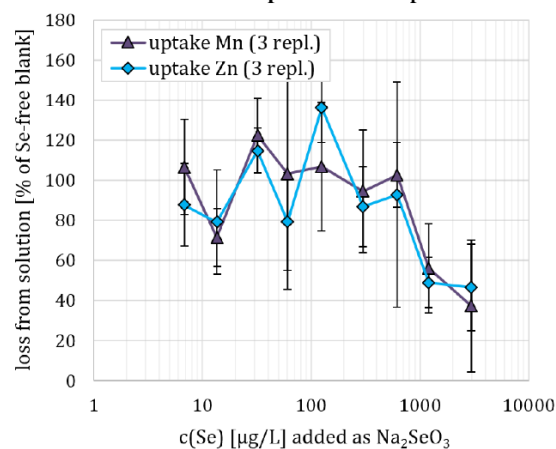

### Cu & Fe uptake into plants

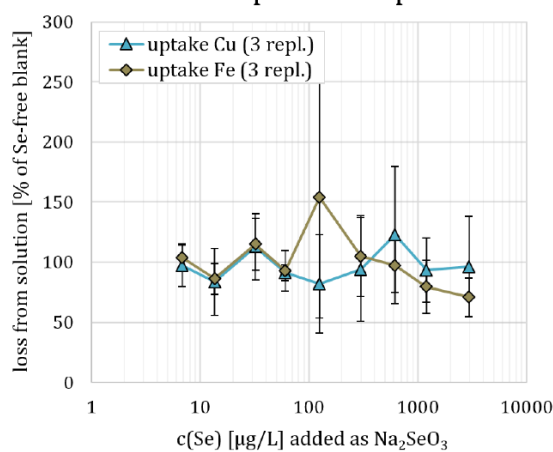

### Se uptake into plants

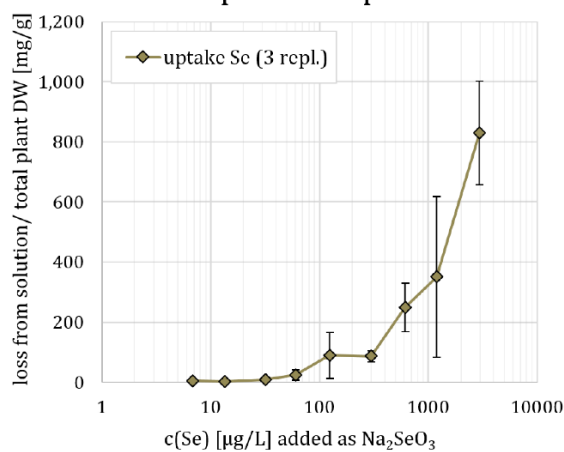

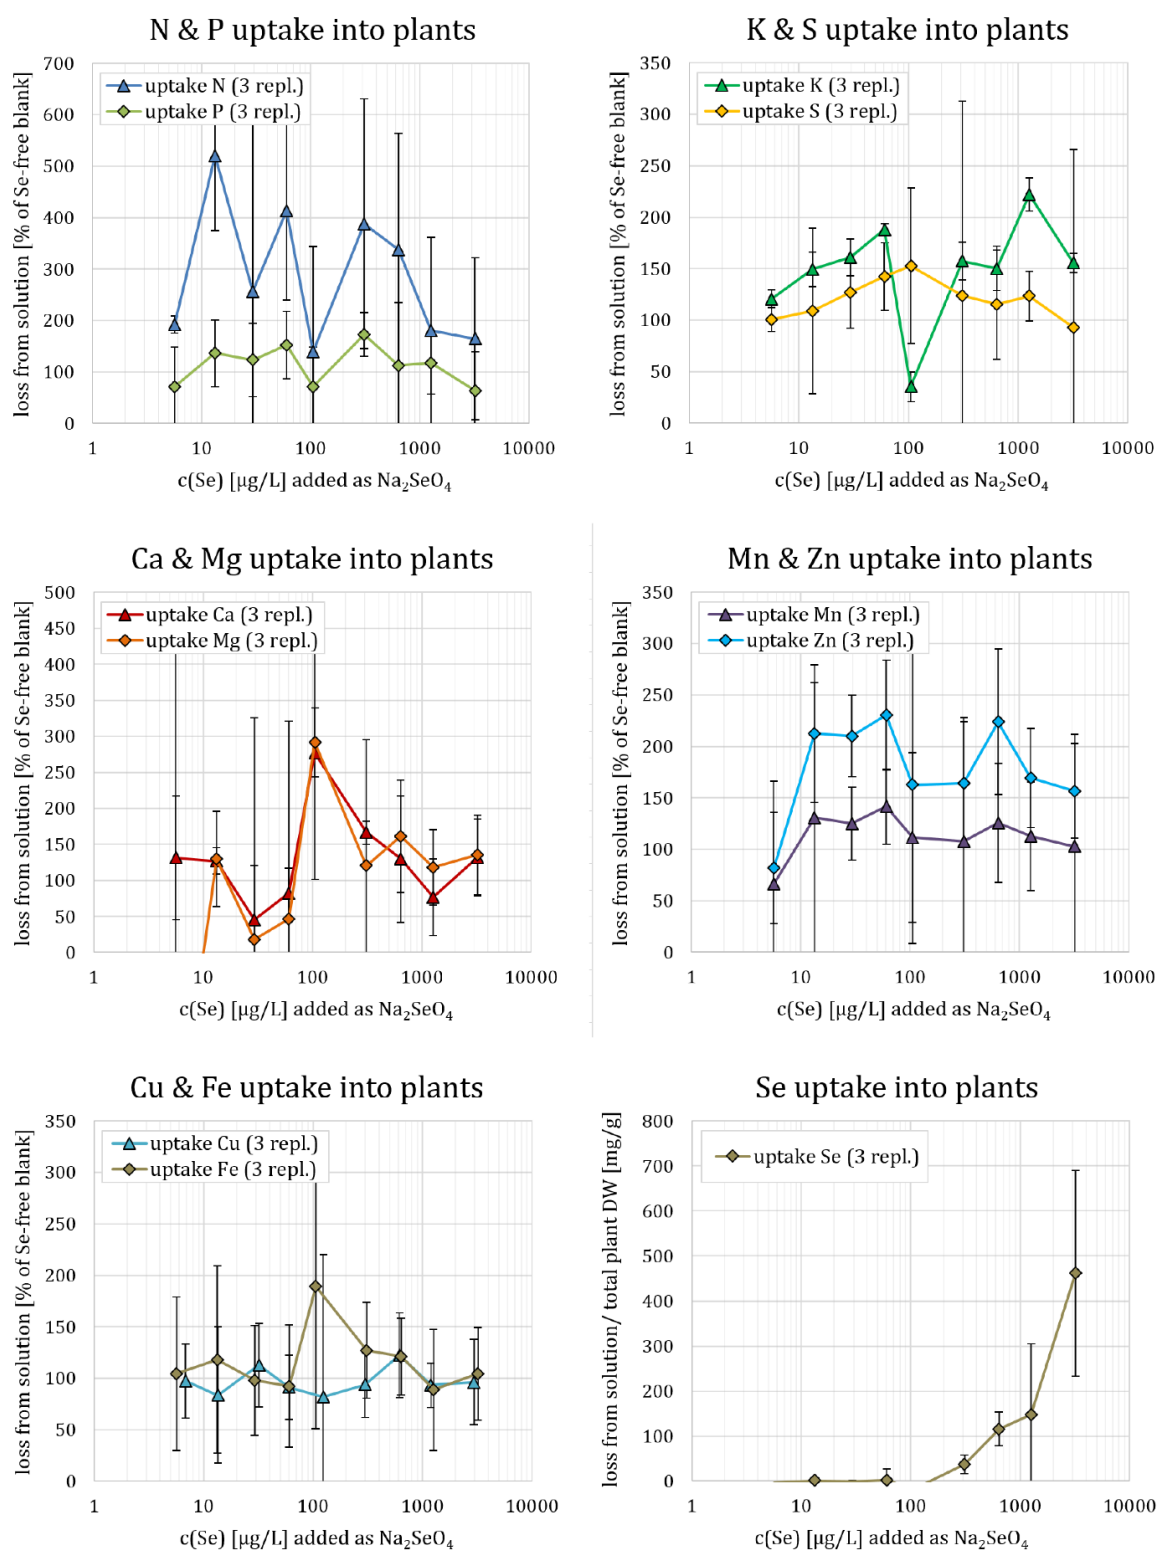

**S12 Fig: Calculated element uptake into plants from nutrient solution plotted against added Se concentration**
