# Supplementary material for: Tracking Se Assimilation and Speciation through the Rice Plant – Nutrient Competition, Toxicity and Distribution
Source: PLOS journal article supplement (doi:10.1371/journal.pone.0152081), 2016-04-26
Supplement: S13 (10.1371/journal.pone.0152081.s013) [file journal.pone.0152081.s013]

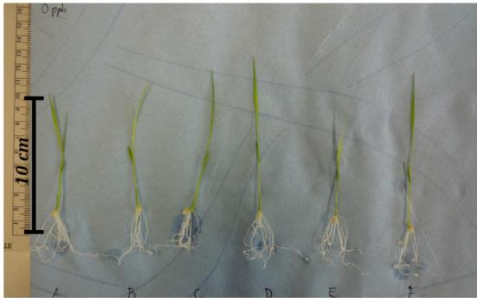

A2-I: 0 µg/L Se as  $\text{Na}_2\text{SeO}_3$

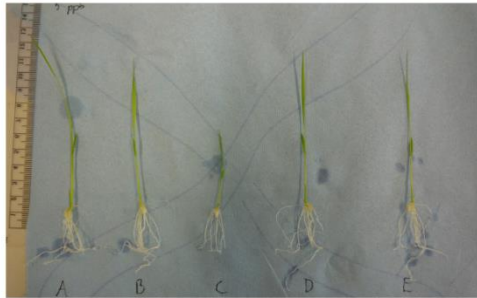

A2-I: 5 µg/L Se as  $\text{Na}_2\text{SeO}_3$

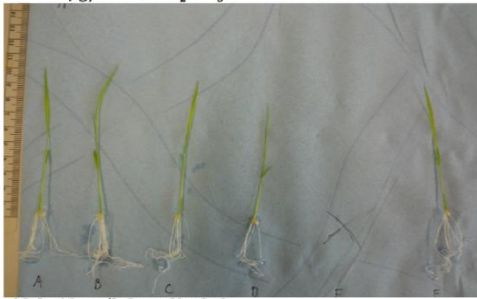

A2-I: 10 µg/L Se as  $\text{Na}_2\text{SeO}_3$

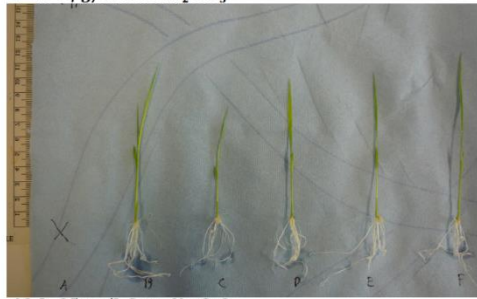

A2-I: 25 µg/L Se as  $\text{Na}_2\text{SeO}_3$

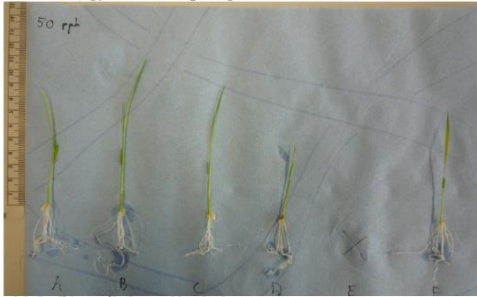

A2-I: 50 µg/L Se as  $\text{Na}_2\text{SeO}_3$

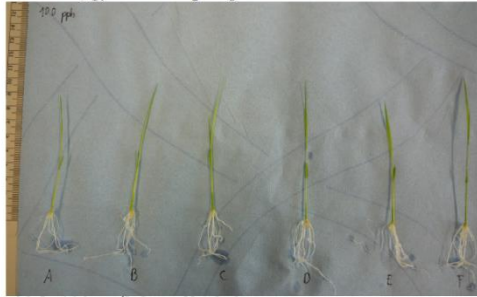

A2-I: 100 µg/L Se as  $\text{Na}_2\text{SeO}_3$

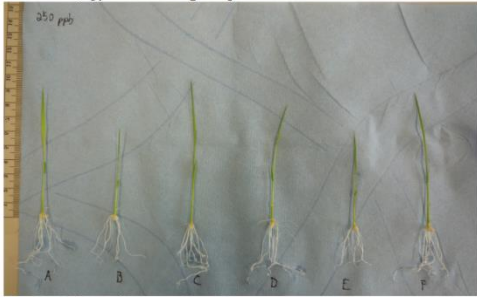

A2-I: 250 µg/L Se as  $\text{Na}_2\text{SeO}_3$

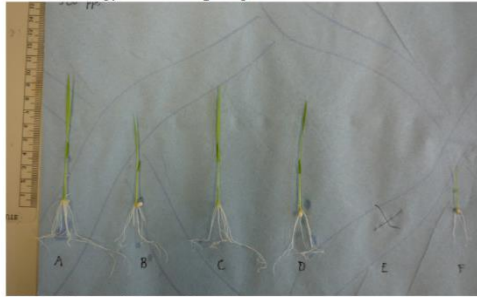

A2-I: 500 µg/L Se as  $\text{Na}_2\text{SeO}_3$

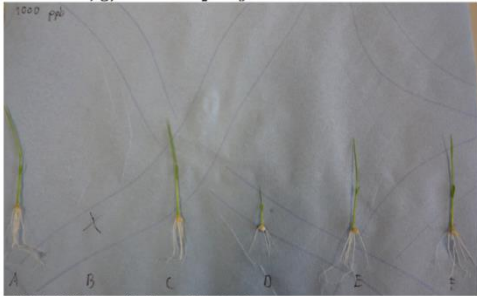

A2-I: 1000 µg/L Se as  $\text{Na}_2\text{SeO}_4$

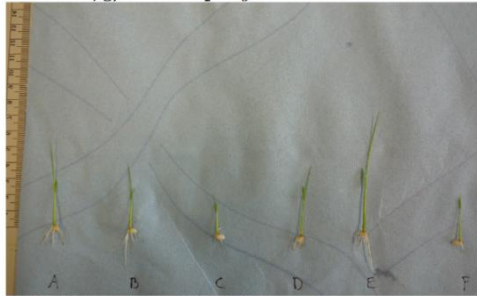

A2-I: 2500 µg/L Se as  $\text{Na}_2\text{SeO}_4$

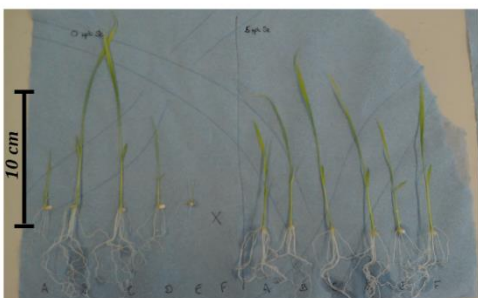

A2-II: 0 & 5 µg/L Se as  $\text{Na}_2\text{SeO}_3$

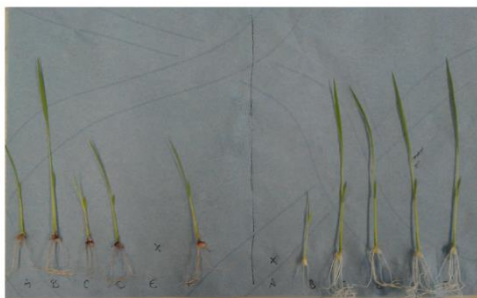

A2-III: 0 & 5 µg/L Se as  $\text{Na}_2\text{SeO}_3$

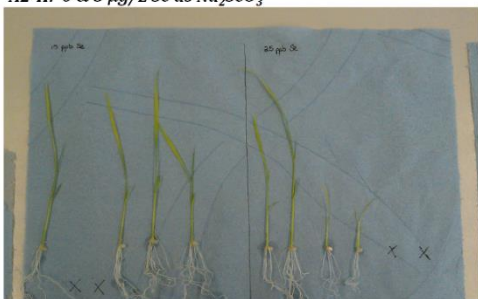

A2-II: 10 & 25 µg/L Se as  $\text{Na}_2\text{SeO}_3$

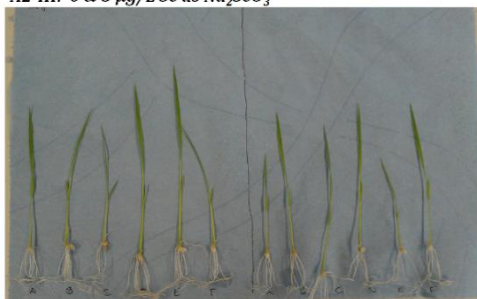

A2-III: 10 & 25 µg/L Se as  $\text{Na}_2\text{SeO}_3$

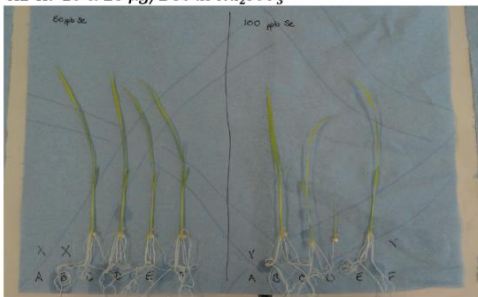

A2-II: 50 & 100 µg/L Se as  $\text{Na}_2\text{SeO}_3$

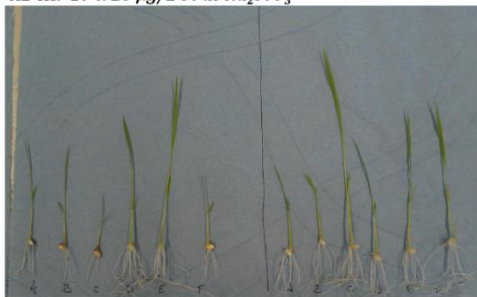

A2-III: 50 & 100 µg/L Se as  $\text{Na}_2\text{SeO}_3$

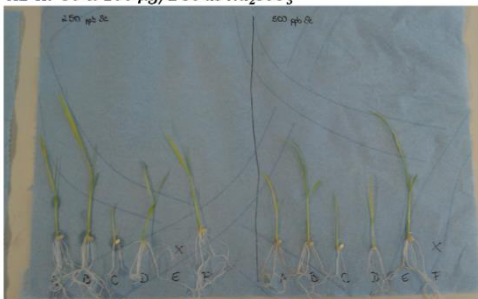

A2-II: 250 & 500 µg/L Se as  $\text{Na}_2\text{SeO}_3$

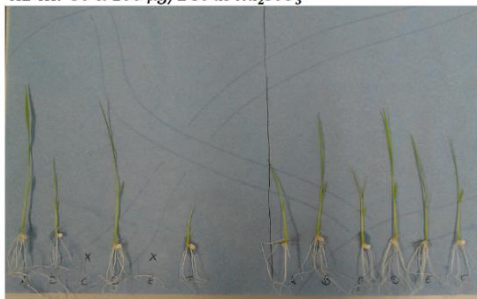

A2-III: 250 & 500 µg/L Se as  $\text{Na}_2\text{SeO}_3$

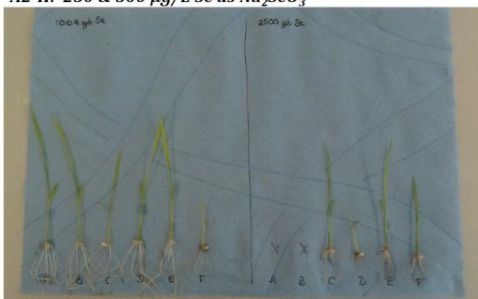

A2-II: 1000 & 2500 µg/L Se as  $\text{Na}_2\text{SeO}_3$

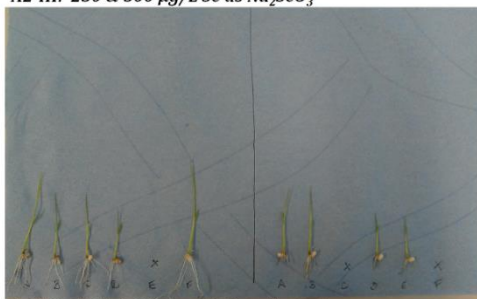

A2-III: 1000 & 2500 µg/L Se as  $\text{Na}_2\text{SeO}_3$

**S13 Fig: Photos of harvested plants treated with  $\text{Na}_2\text{SeO}_3$  in phytoagar & direct Se**
