# Supplementary material for: Tracking Se Assimilation and Speciation through the Rice Plant – Nutrient Competition, Toxicity and Distribution
Source: PLOS journal article supplement (doi:10.1371/journal.pone.0152081), 2016-04-26
Supplement: S17 (10.1371/journal.pone.0152081.s017) [file journal.pone.0152081.s017]

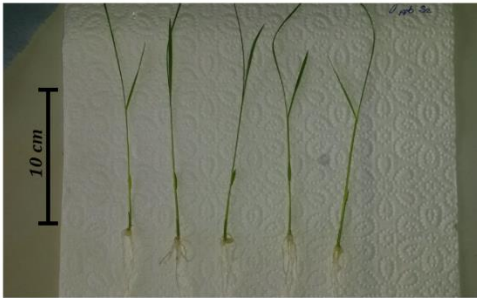

A4: 0 µg/L Se as  $\text{Na}_2\text{SeO}_3$

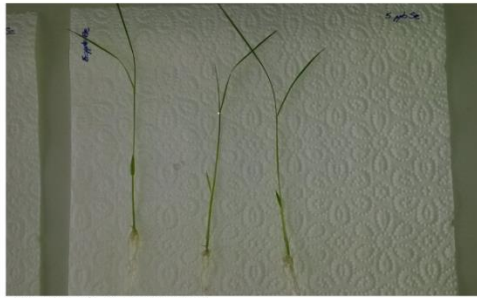

A4: 5 µg/L Se as  $\text{Na}_2\text{SeO}_3$

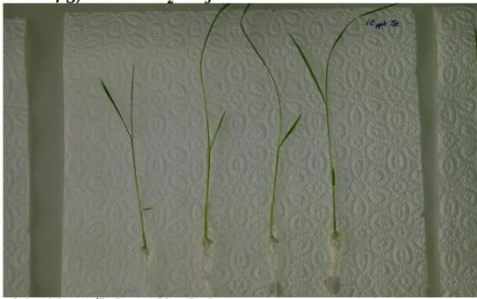

A4: 10 µg/L Se as  $\text{Na}_2\text{SeO}_3$

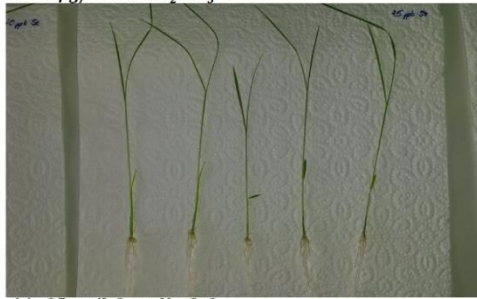

A4: 25 µg/L Se as  $\text{Na}_2\text{SeO}_3$

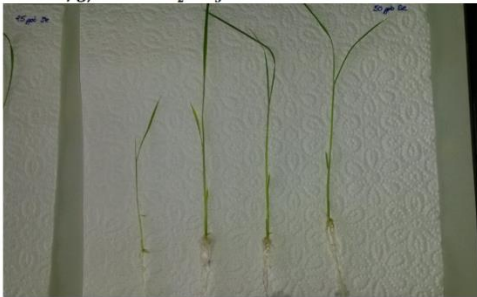

A4: 50 µg/L Se as  $\text{Na}_2\text{SeO}_3$

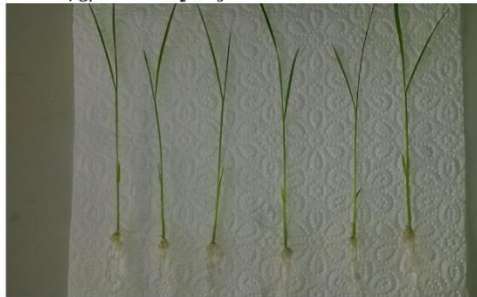

A4: 100 µg/L Se as  $\text{Na}_2\text{SeO}_3$

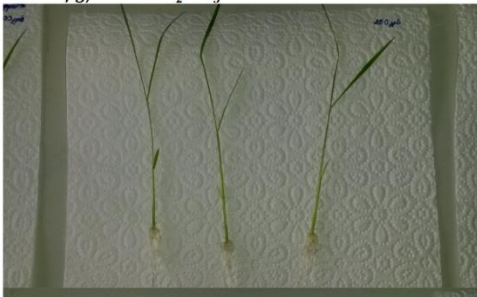

A4: 250 µg/L Se as  $\text{Na}_2\text{SeO}_3$

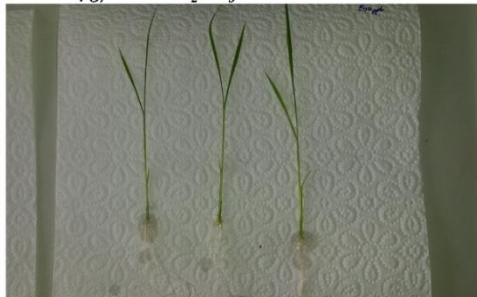

A4: 500 µg/L Se as  $\text{Na}_2\text{SeO}_3$

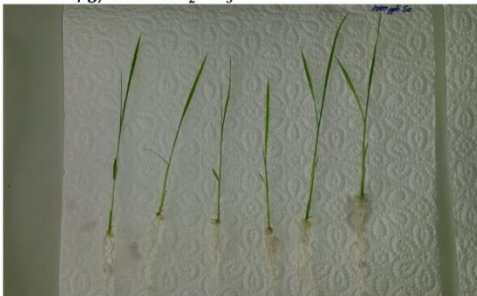

A4: 1000 µg/L Se as  $\text{Na}_2\text{SeO}_3$

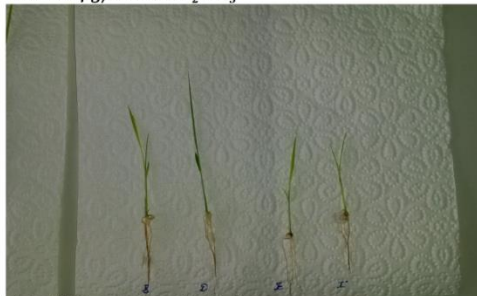

A4: 2500 µg/L Se as  $\text{Na}_2\text{SeO}_3$

**S17 Fig: Photos of harvested plants treated with  $\text{Na}_2\text{SeO}_3$  in phytoagar & delayed Se**
