# Supplementary material for: Tracking Se Assimilation and Speciation through the Rice Plant – Nutrient Competition, Toxicity and Distribution
Source: PLOS journal article supplement (doi:10.1371/journal.pone.0152081), 2016-04-26
Supplement: S18 (10.1371/journal.pone.0152081.s018) [file journal.pone.0152081.s018]

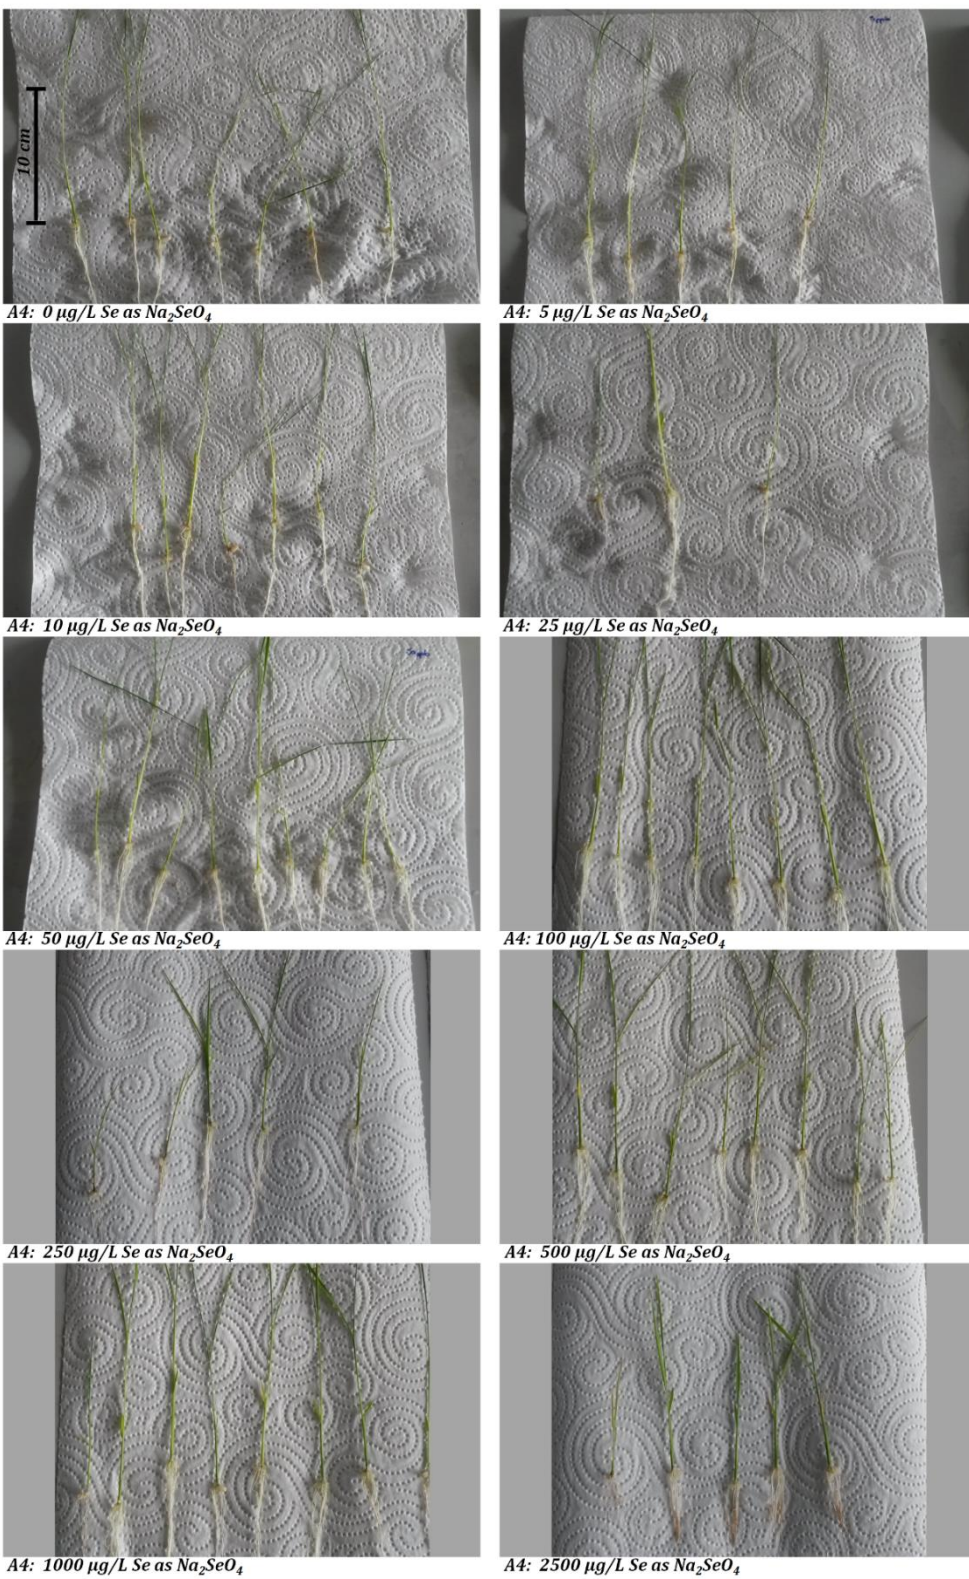

**S18 Fig: Photos of harvested plants treated with  $\text{Na}_2\text{SeO}_4$  in phytoagar & delayed Se**
