# Supplementary material for: Tracking Se Assimilation and Speciation through the Rice Plant – Nutrient Competition, Toxicity and Distribution
Source: PLOS journal article supplement (doi:10.1371/journal.pone.0152081), 2016-04-26
Supplement: S19 (10.1371/journal.pone.0152081.s019) [file journal.pone.0152081.s019]

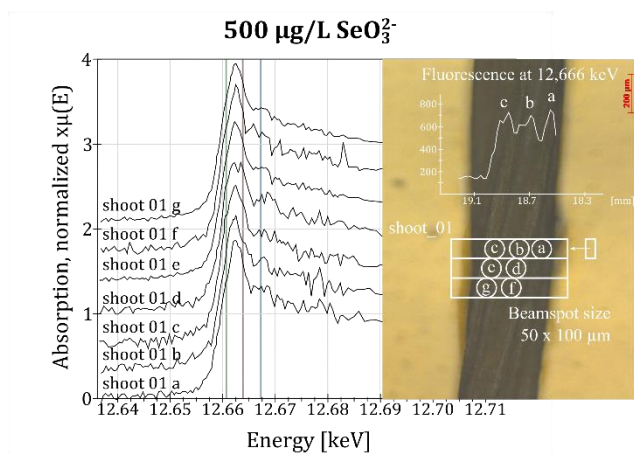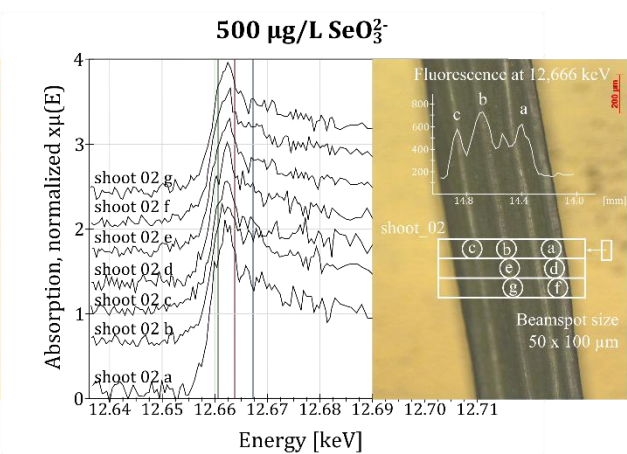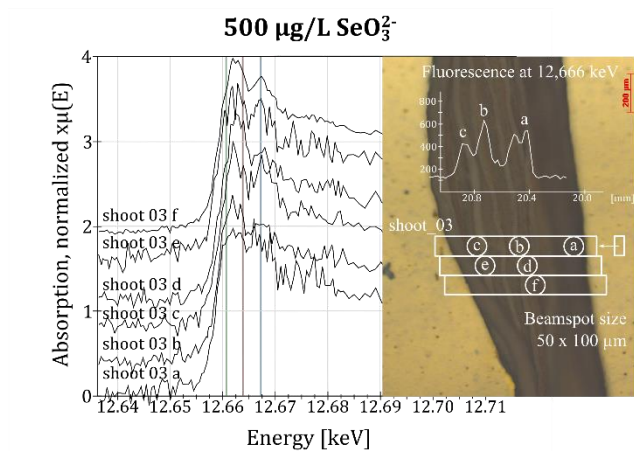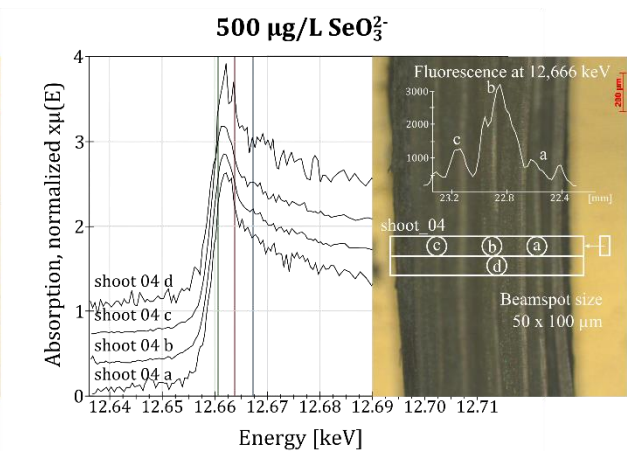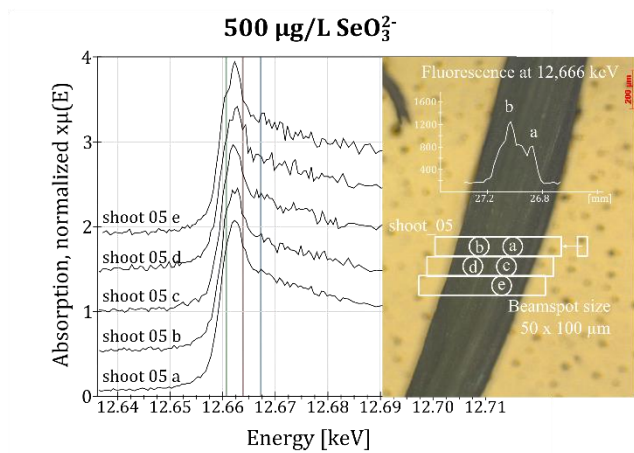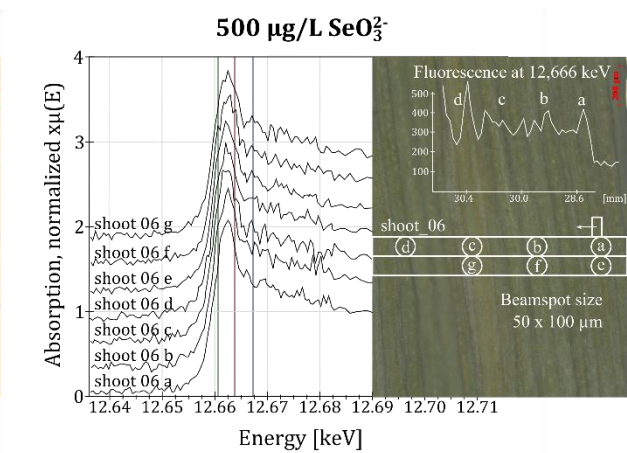

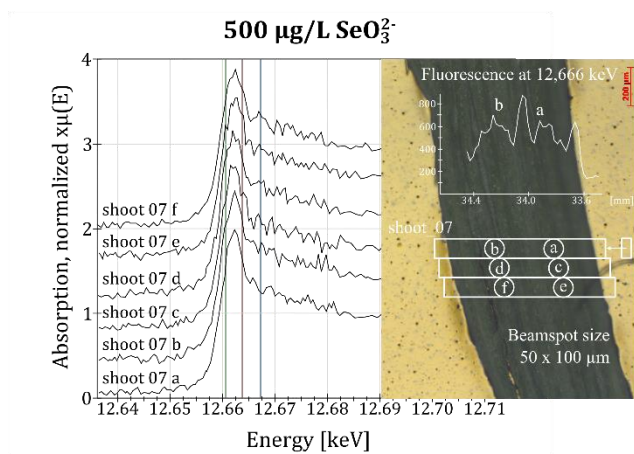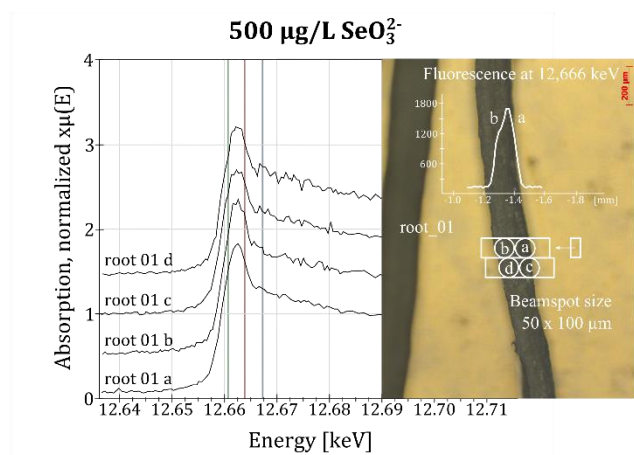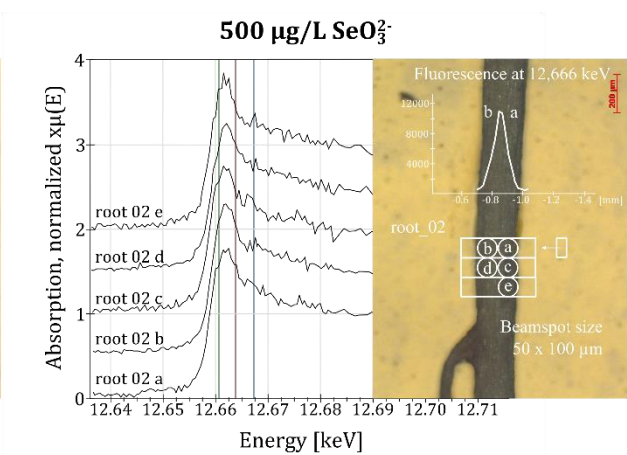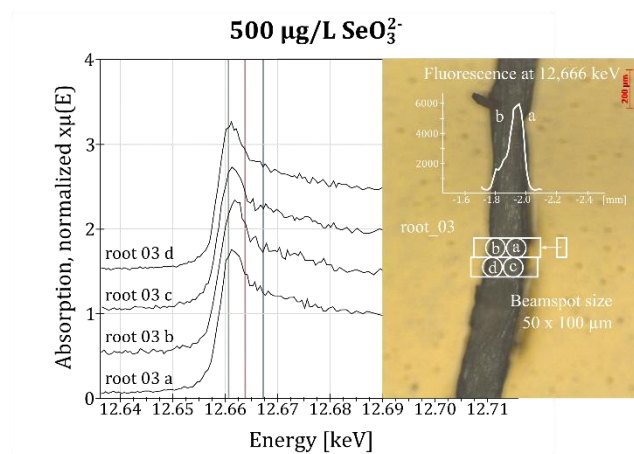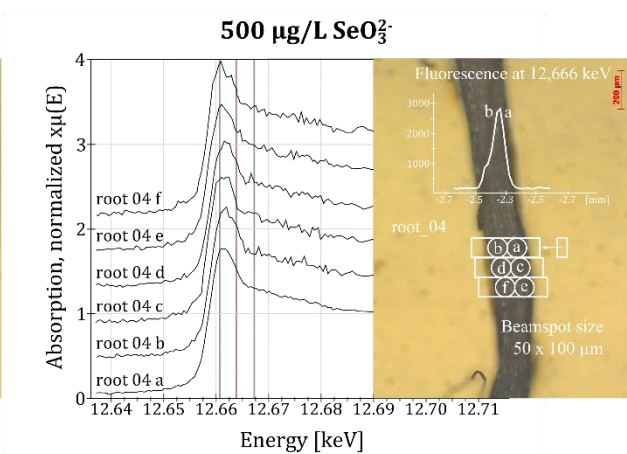

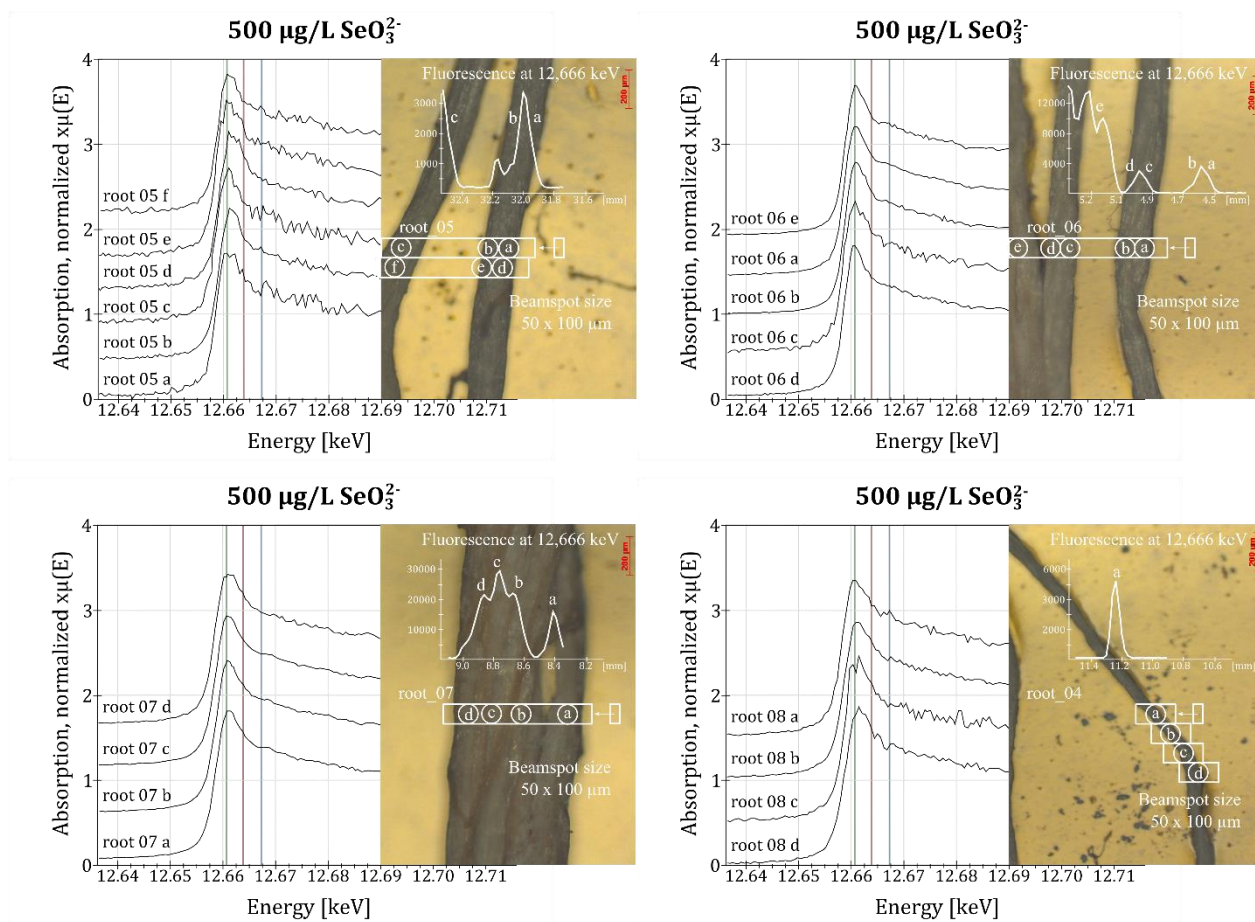

**S1 Fig: all XANES spectra of each region of interest (ROI) on a rice plant treated with 500  $\mu\text{g/L Se}$  as  $\text{Na}_2\text{SeO}_3$  in nutrient solution**
