# Supplementary material for: Tracking Se Assimilation and Speciation through the Rice Plant – Nutrient Competition, Toxicity and Distribution
Source: PLOS journal article supplement (doi:10.1371/journal.pone.0152081), 2016-04-26
Supplement: S25 (10.1371/journal.pone.0152081.s025) [file journal.pone.0152081.s025]

**S1 Table: One-way ANOVA results for shoot-Se in agar plants when added as selenite**

| <b>Groups (k)</b>         | <b>Number (n)</b>          | <b>Sum</b>                     | <b>Mean</b>                     | <b>Variance</b>             |                |                         |
|---------------------------|----------------------------|--------------------------------|---------------------------------|-----------------------------|----------------|-------------------------|
| added c(Se) 0 µg/L        | 3                          | 0.05                           | 0.02                            | 0.00                        |                |                         |
| added c(Se) 5 µg/L        | 3                          | 1.08                           | 0.36                            | 0.39                        |                |                         |
| added c(Se) 10 µg/L       | 3                          | 0.65                           | 0.22                            | 0.06                        |                |                         |
| added c(Se) 25 µg/L       | 3                          | 2.35                           | 0.78                            | 0.46                        |                |                         |
| added c(Se) 50 µg/L       | 3                          | 7.50                           | 2.50                            | 0.53                        |                |                         |
| added c(Se) 100 µg/L      | 3                          | 9.87                           | 3.29                            | 1.76                        |                |                         |
| added c(Se) 250 µg/L      | 3                          | 52.12                          | 17.37                           | 89.55                       |                |                         |
| added c(Se) 500 µg/L      | 3                          | 90.12                          | 30.04                           | 75.60                       |                |                         |
| added c(Se) 1000 µg/L     | 3                          | 189.21                         | 63.07                           | 495.78                      |                |                         |
| added c(Se) 2500 µg/L     | 3                          | 433.89                         | 144.63                          | 1622.09                     |                |                         |
| <b>Distribution</b>       | <b>Sum of squares (SS)</b> | <b>Degrees of freedom (df)</b> | <b>Mean sum of squares (MS)</b> | <b>Testing variable (F)</b> | <b>P-value</b> | <b>Critical F-value</b> |
| Difference between groups | 57717.26                   | 9.00                           | 6413.03                         | 28.05                       | 1.95E-09       | 2.39                    |
| Difference within groups  | 4572.44                    | 20.00                          | 228.62                          |                             |                |                         |
| total                     | 62289.70                   | 29.00                          |                                 |                             |                |                         |
