# Supplementary material for: Tracking Se Assimilation and Speciation through the Rice Plant – Nutrient Competition, Toxicity and Distribution
Source: PLOS journal article supplement (doi:10.1371/journal.pone.0152081), 2016-04-26
Supplement: S26 (10.1371/journal.pone.0152081.s026) [file journal.pone.0152081.s026]

**S1 Table: One-way ANOVA results for root-Se in agar plants when added as selenite**

| <b>Groups (k)</b>         | <b>Number (n)</b>          | <b>Sum</b>                     | <b>Mean</b>                     | <b>Variance</b>             |                |                         |
|---------------------------|----------------------------|--------------------------------|---------------------------------|-----------------------------|----------------|-------------------------|
| added c(Se) 0 µg/L        | 3                          | 0.00                           | 0.00                            | 0.00                        |                |                         |
| added c(Se) 5 µg/L        | 3                          | 8.59                           | 2.86                            | 3.20                        |                |                         |
| added c(Se) 10 µg/L       | 3                          | 17.80                          | 5.93                            | 7.88                        |                |                         |
| added c(Se) 25 µg/L       | 3                          | 34.10                          | 11.37                           | 0.54                        |                |                         |
| added c(Se) 50 µg/L       | 3                          | 78.80                          | 26.27                           | 314.83                      |                |                         |
| added c(Se) 100 µg/L      | 3                          | 107.68                         | 35.89                           | 46.73                       |                |                         |
| added c(Se) 250 µg/L      | 3                          | 189.47                         | 63.16                           | 785.79                      |                |                         |
| added c(Se) 500 µg/L      | 3                          | 276.60                         | 92.20                           | 2370.37                     |                |                         |
| added c(Se) 1000 µg/L     | 3                          | 531.93                         | 177.31                          | 4148.75                     |                |                         |
| added c(Se) 2500 µg/L     | 3                          | 307.30                         | 102.43                          | 1964.41                     |                |                         |
| <b>Distribution</b>       | <b>Sum of squares (SS)</b> | <b>Degrees of freedom (df)</b> | <b>Mean sum of squares (MS)</b> | <b>Testing variable (F)</b> | <b>P-value</b> | <b>Critical F-value</b> |
| Difference between groups | 89398.66                   | 9.00                           | 9933.18                         | 10.30                       | 9.16E-06       | 2.39                    |
| Difference within groups  | 19285.03                   | 20.00                          | 964.25                          |                             |                |                         |
| total                     | 108683.69                  | 29.00                          |                                 |                             |                |                         |
