# Supplementary material for: Tracking Se Assimilation and Speciation through the Rice Plant – Nutrient Competition, Toxicity and Distribution
Source: PLOS journal article supplement (doi:10.1371/journal.pone.0152081), 2016-04-26
Supplement: S27 (10.1371/journal.pone.0152081.s027) [file journal.pone.0152081.s027]

**S1 Table: One-way ANOVA results for shoot-Se in agar plants when added as selenate**

| <b>Groups (k)</b>         | <b>Number (n)</b>          | <b>Sum</b>                     | <b>Mean</b>                     | <b>Variance</b>             |                |                         |
|---------------------------|----------------------------|--------------------------------|---------------------------------|-----------------------------|----------------|-------------------------|
| added c(Se) 0 µg/L        | 3                          | 0.20                           | 0.07                            | 0.01                        |                |                         |
| added c(Se) 5 µg/L        | 3                          | 18.54                          | 6.18                            | 5.08                        |                |                         |
| added c(Se) 10 µg/L       | 3                          | 31.93                          | 10.64                           | 12.83                       |                |                         |
| added c(Se) 25 µg/L       | 3                          | 112.00                         | 37.33                           | 503.22                      |                |                         |
| added c(Se) 50 µg/L       | 3                          | 295.82                         | 98.61                           | 1564.10                     |                |                         |
| added c(Se) 100 µg/L      | 3                          | 580.73                         | 193.58                          | 1589.16                     |                |                         |
| added c(Se) 250 µg/L      | 3                          | 1099.92                        | 366.64                          | 7082.42                     |                |                         |
| added c(Se) 500 µg/L      | 3                          | 429.53                         | 143.18                          | 3756.80                     |                |                         |
| added c(Se) 1000 µg/L     | 3                          | 221.74                         | 73.91                           | 878.42                      |                |                         |
| added c(Se) 2500 µg/L     | 3                          | 201.97                         | 67.32                           | 128.32                      |                |                         |
| <b>Distribution</b>       | <b>Sum of squares (SS)</b> | <b>Degrees of freedom (df)</b> | <b>Mean sum of squares (MS)</b> | <b>Testing variable (F)</b> | <b>P-value</b> | <b>Critical F-value</b> |
| Difference between groups | 342501.01                  | 9.00                           | 38055.67                        | 24.52                       | 6.53E-09       | 2.39                    |
| Difference within groups  | 31040.74                   | 20.00                          | 1552.04                         |                             |                |                         |
| total                     | 373541.76                  | 29.00                          |                                 |                             |                |                         |
