# Supplementary material for: Tracking Se Assimilation and Speciation through the Rice Plant – Nutrient Competition, Toxicity and Distribution
Source: PLOS journal article supplement (doi:10.1371/journal.pone.0152081), 2016-04-26
Supplement: S28 (10.1371/journal.pone.0152081.s028) [file journal.pone.0152081.s028]

**S1 Table: One-way ANOVA results for root-Se in agar plants when added as selenate**

| <b>Groups (k)</b>         | <b>Number (n)</b>          | <b>Sum</b>                     | <b>Mean</b>                     | <b>Variance</b>             |                |                         |
|---------------------------|----------------------------|--------------------------------|---------------------------------|-----------------------------|----------------|-------------------------|
| added c(Se) 0 µg/L        | 3                          | 0.09                           | 0.03                            | 0.00                        |                |                         |
| added c(Se) 5 µg/L        | 3                          | 5.49                           | 1.83                            | 0.13                        |                |                         |
| added c(Se) 10 µg/L       | 3                          | 9.95                           | 3.32                            | 0.07                        |                |                         |
| added c(Se) 25 µg/L       | 3                          | 26.76                          | 8.92                            | 26.09                       |                |                         |
| added c(Se) 50 µg/L       | 3                          | 64.74                          | 21.58                           | 4.13                        |                |                         |
| added c(Se) 100 µg/L      | 3                          | 134.86                         | 44.95                           | 205.35                      |                |                         |
| added c(Se) 250 µg/L      | 3                          | 286.65                         | 95.55                           | 1500.89                     |                |                         |
| added c(Se) 500 µg/L      | 3                          | 287.26                         | 95.75                           | 2250.82                     |                |                         |
| added c(Se) 1000 µg/L     | 3                          | 232.32                         | 77.44                           | 913.02                      |                |                         |
| added c(Se) 2500 µg/L     | 3                          | 201.53                         | 67.18                           | 1047.96                     |                |                         |
| <b>Distribution</b>       | <b>Sum of squares (SS)</b> | <b>Degrees of freedom (df)</b> | <b>Mean sum of squares (MS)</b> | <b>Testing variable (F)</b> | <b>P-value</b> | <b>Critical F-value</b> |
| Difference between groups | 42112.64                   | 9.00                           | 4679.18                         | 7.87                        | 6.75E-05       | 2.39                    |
| Difference within groups  | 11896.98                   | 20.00                          | 594.85                          |                             |                |                         |
| total                     | 54009.62                   | 29.00                          |                                 |                             |                |                         |
