# Supplementary material for: Tracking Se Assimilation and Speciation through the Rice Plant – Nutrient Competition, Toxicity and Distribution
Source: PLOS journal article supplement (doi:10.1371/journal.pone.0152081), 2016-04-26
Supplement: S29 (10.1371/journal.pone.0152081.s029) [file journal.pone.0152081.s029]

**S1 Table: One-way ANOVA results for shoot-Se in nut.sol. plants when added as selenite**

| <b>Groups (k)</b>         | <b>Number (n)</b>          | <b>Sum</b>                     | <b>Mean</b>                     | <b>Variance</b>             |                |                         |
|---------------------------|----------------------------|--------------------------------|---------------------------------|-----------------------------|----------------|-------------------------|
| added c(Se) 0 µg/L        | 3                          | 0.00                           | 0.00                            | 0.00                        |                |                         |
| added c(Se) 5 µg/L        | 3                          | 1.24                           | 0.41                            | 0.03                        |                |                         |
| added c(Se) 10 µg/L       | 3                          | 2.90                           | 0.97                            | 0.18                        |                |                         |
| added c(Se) 25 µg/L       | 3                          | 7.05                           | 2.35                            | 0.34                        |                |                         |
| added c(Se) 50 µg/L       | 3                          | 16.73                          | 5.58                            | 6.06                        |                |                         |
| added c(Se) 100 µg/L      | 3                          | 28.74                          | 9.58                            | 3.19                        |                |                         |
| added c(Se) 250 µg/L      | 3                          | 85.25                          | 28.42                           | 17.20                       |                |                         |
| added c(Se) 500 µg/L      | 3                          | 178.01                         | 59.34                           | 80.16                       |                |                         |
| added c(Se) 1000 µg/L     | 3                          | 305.72                         | 101.91                          | 833.96                      |                |                         |
| added c(Se) 2500 µg/L     | 3                          | 476.95                         | 158.98                          | 922.72                      |                |                         |
| <b>Distribution</b>       | <b>Sum of squares (SS)</b> | <b>Degrees of freedom (df)</b> | <b>Mean sum of squares (MS)</b> | <b>Testing variable (F)</b> | <b>P-value</b> | <b>Critical F-value</b> |
| Difference between groups | 79832.70                   | 9.00                           | 8870.30                         | 47.59                       | 1.48E-11       | 2.39                    |
| Difference within groups  | 3727.68                    | 20.00                          | 186.38                          |                             |                |                         |
| total                     | 83560.38                   | 29.00                          |                                 |                             |                |                         |
