# Supplementary material for: Tracking Se Assimilation and Speciation through the Rice Plant – Nutrient Competition, Toxicity and Distribution
Source: PLOS journal article supplement (doi:10.1371/journal.pone.0152081), 2016-04-26
Supplement: S30 (10.1371/journal.pone.0152081.s030) [file journal.pone.0152081.s030]

**S1 Table: One-way ANOVA results for root-Se in nut.sol. plants when added as selenite**

| <b>Groups (k)</b>         | <b>Number (n)</b>          | <b>Sum</b>                     | <b>Mean</b>                     | <b>Variance</b>             |                |                         |
|---------------------------|----------------------------|--------------------------------|---------------------------------|-----------------------------|----------------|-------------------------|
| added c(Se) 0 µg/L        | 3                          | 0.00                           | 0.00                            | 0.00                        |                |                         |
| added c(Se) 5 µg/L        | 3                          | 3.21                           | 1.07                            | 0.29                        |                |                         |
| added c(Se) 10 µg/L       | 3                          | 5.80                           | 1.93                            | 0.86                        |                |                         |
| added c(Se) 25 µg/L       | 3                          | 16.54                          | 5.51                            | 7.02                        |                |                         |
| added c(Se) 50 µg/L       | 3                          | 66.05                          | 22.02                           | 184.57                      |                |                         |
| added c(Se) 100 µg/L      | 3                          | 80.12                          | 26.71                           | 230.07                      |                |                         |
| added c(Se) 250 µg/L      | 3                          | 168.37                         | 56.12                           | 31.06                       |                |                         |
| added c(Se) 500 µg/L      | 3                          | 420.40                         | 140.13                          | 1259.38                     |                |                         |
| added c(Se) 1000 µg/L     | 3                          | 534.42                         | 178.14                          | 1429.71                     |                |                         |
| added c(Se) 2500 µg/L     | 3                          | 936.13                         | 312.04                          | 214.73                      |                |                         |
| <b>Distribution</b>       | <b>Sum of squares (SS)</b> | <b>Degrees of freedom (df)</b> | <b>Mean sum of squares (MS)</b> | <b>Testing variable (F)</b> | <b>P-value</b> | <b>Critical F-value</b> |
| Difference between groups | 293460.48                  | 9.00                           | 32606.72                        | 97.11                       | 1.60E-14       | 2.39                    |
| Difference within groups  | 6715.38                    | 20.00                          | 335.77                          |                             |                |                         |
| total                     | 300175.86                  | 29.00                          |                                 |                             |                |                         |
