# Supplementary material for: Tracking Se Assimilation and Speciation through the Rice Plant – Nutrient Competition, Toxicity and Distribution
Source: PLOS journal article supplement (doi:10.1371/journal.pone.0152081), 2016-04-26
Supplement: S31 (10.1371/journal.pone.0152081.s031) [file journal.pone.0152081.s031]

**S1 Table: One-way ANOVA results for shoot-Se in nut.sol. plants when added as selenate**

| <b>Groups (k)</b>         | <b>Number (n)</b>          | <b>Sum</b>                     | <b>Mean</b>                     | <b>Variance</b>             |                |                         |
|---------------------------|----------------------------|--------------------------------|---------------------------------|-----------------------------|----------------|-------------------------|
| added c(Se) 0 µg/L        | 3                          | 0.19                           | 0.06                            | 0.01                        |                |                         |
| added c(Se) 5 µg/L        | 3                          | 1.74                           | 0.58                            | 0.21                        |                |                         |
| added c(Se) 10 µg/L       | 3                          | 2.26                           | 0.75                            | 0.03                        |                |                         |
| added c(Se) 25 µg/L       | 3                          | 6.59                           | 2.20                            | 0.07                        |                |                         |
| added c(Se) 50 µg/L       | 3                          | 17.26                          | 5.75                            | 2.06                        |                |                         |
| added c(Se) 100 µg/L      | 3                          | 27.22                          | 9.07                            | 25.86                       |                |                         |
| added c(Se) 250 µg/L      | 3                          | 121.74                         | 40.58                           | 114.77                      |                |                         |
| added c(Se) 500 µg/L      | 3                          | 244.91                         | 81.64                           | 204.99                      |                |                         |
| added c(Se) 1000 µg/L     | 3                          | 573.13                         | 191.04                          | 47.94                       |                |                         |
| added c(Se) 2500 µg/L     | 3                          | 1216.02                        | 405.34                          | 3415.09                     |                |                         |
| <b>Distribution</b>       | <b>Sum of squares (SS)</b> | <b>Degrees of freedom (df)</b> | <b>Mean sum of squares (MS)</b> | <b>Testing variable (F)</b> | <b>P-value</b> | <b>Critical F-value</b> |
| Difference between groups | 464727.90                  | 9.00                           | 51636.43                        | 135.49                      | 6.22E-16       | 2.39                    |
| Difference within groups  | 7622.08                    | 20.00                          | 381.10                          |                             |                |                         |
| total                     | 472349.98                  | 29.00                          |                                 |                             |                |                         |
